# Supplementary material for: Evolutionary history of the human multigene families reveals widespread gene duplications throughout the history of animals
Source: Springer Nature journal article supplement (doi:10.1186/s12862-019-1441-0), 2019-06-20
Supplement: 12862_2019_1441_MOESM4_ESM.pdf [file 12862_2019_1441_MOESM4_ESM.pdf]

**Additional file 4: Maximum Likelihood Trees of gene families (residing on human chromosomes 1/2/8/20) based on WAG model.**

**Co-duplicated group-1**

**MROH8 and STK**

## Maestro Heat-like Repeat-containing Protein Family -MROH

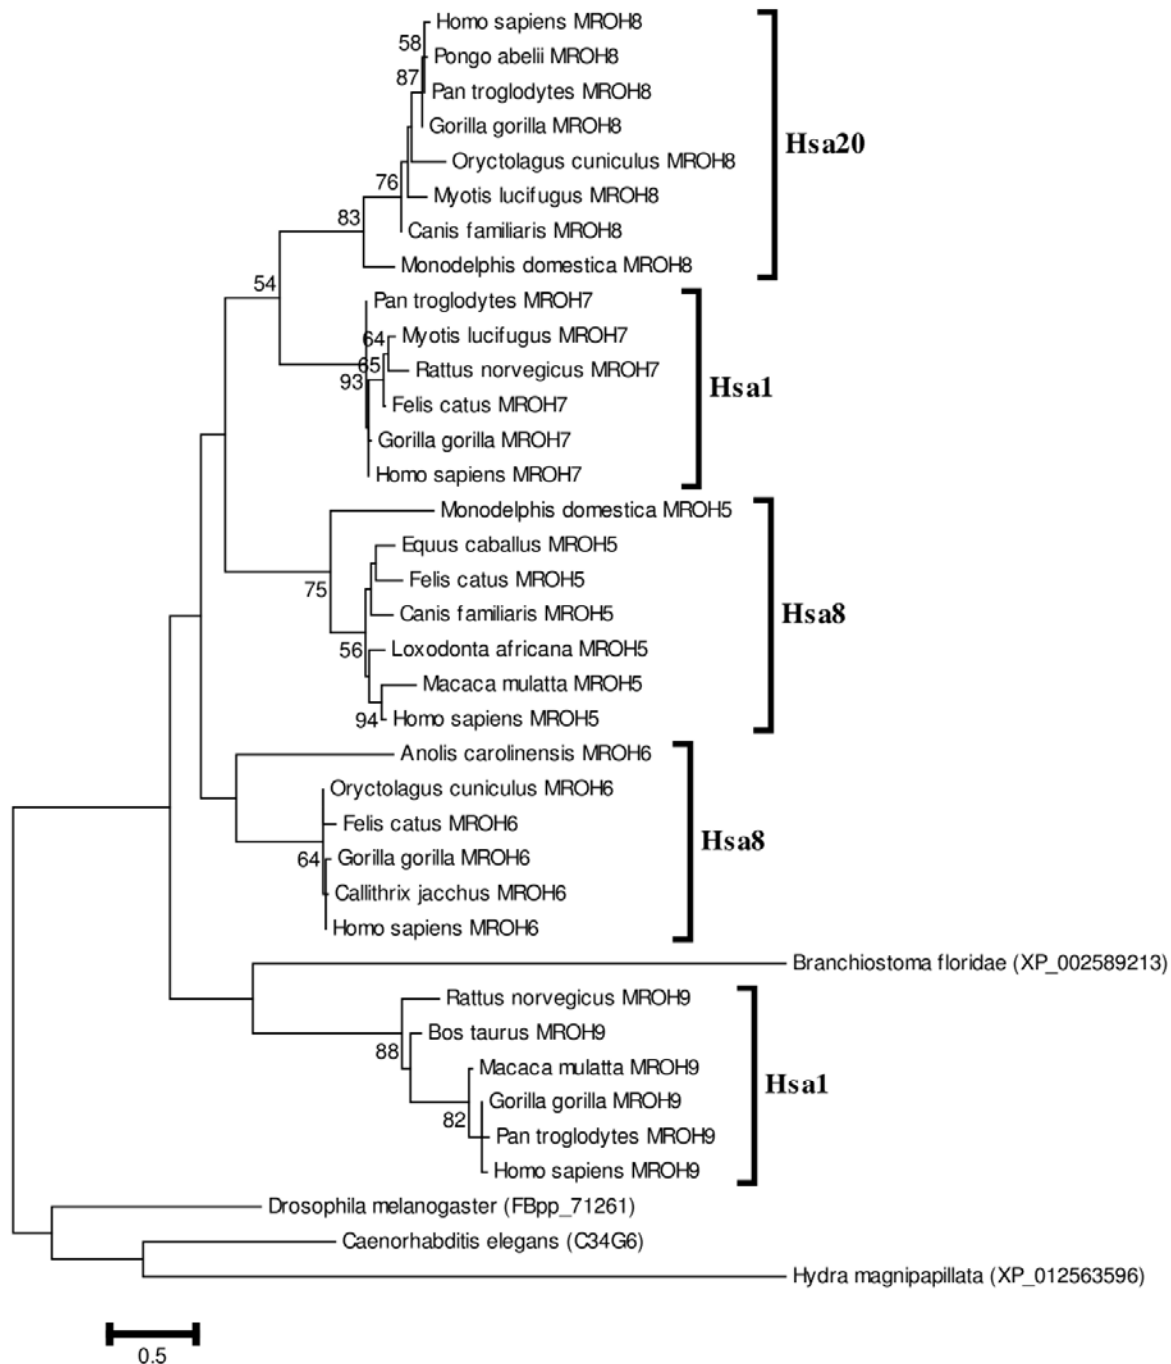

### Phylogenetic tree of MROH family.

The evolutionary history was inferred by using the Maximum Likelihood method based on the Whelan And Goldman model. The tree with the highest log likelihood (-3194.2605) is shown. The percentage of trees in which the associated taxa clustered together is shown next to the branches ; only the values  $\geq 50\%$  are shown here. A discrete Gamma distribution was used to model evolutionary rate differences among sites (5 categories (+G, parameter = 9.5137)). The tree is drawn to scale, with branch lengths measured in the number of substitutions per site. The analysis involved 37 amino acid sequences. All positions containing gaps and missing data were eliminated. There were a total of 80 positions in the final dataset.

## Serine/Threonine-Protein Kinase-STK

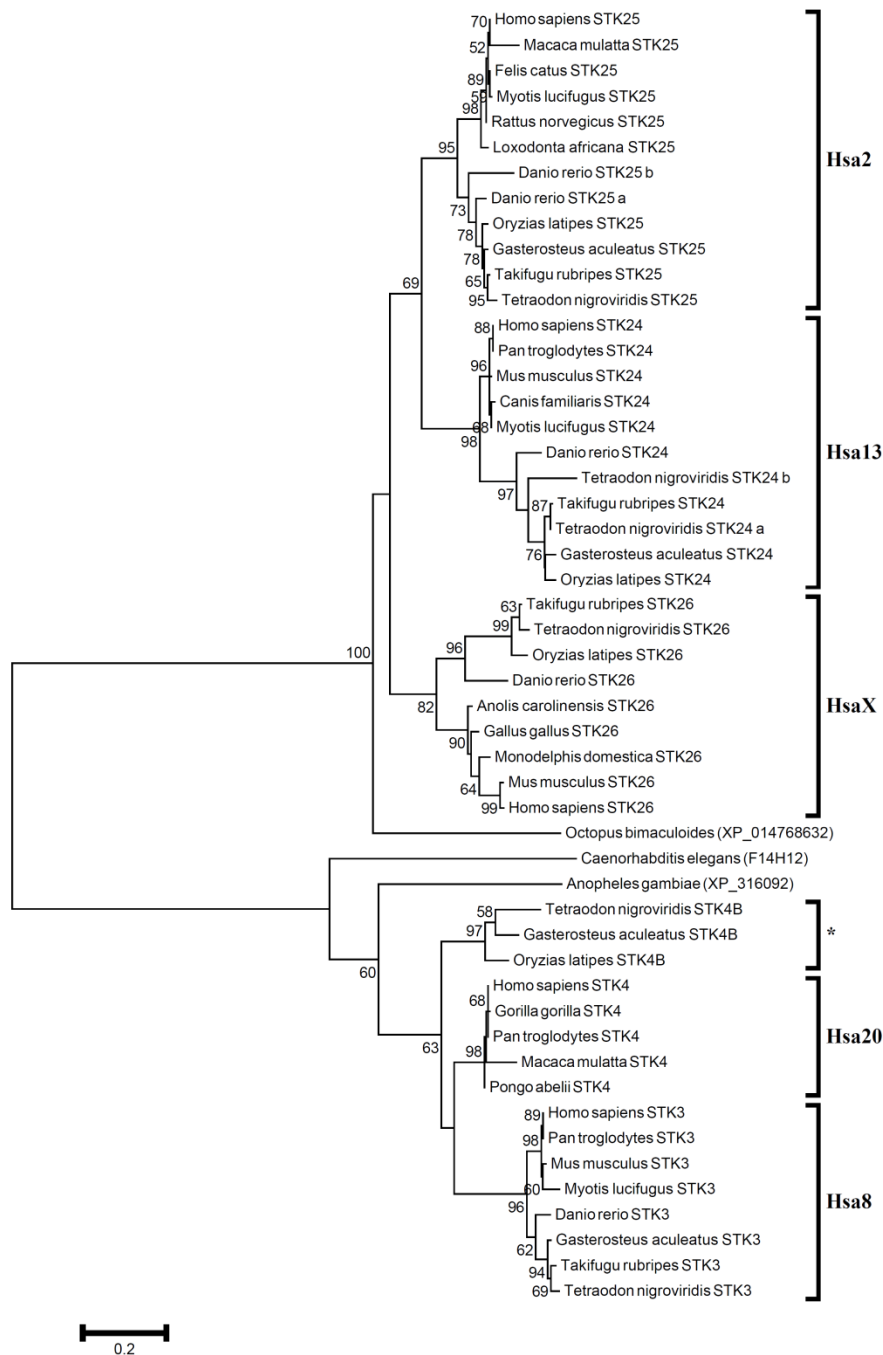

### Phylogenetic tree of STK family.

The evolutionary history was inferred by using the Maximum Likelihood method based on the Whelan And Goldman model. The tree with the highest log likelihood (-5708.4638) is shown. The percentage of trees in which the associated taxa clustered together is shown next to the branches ; only the values  $\geq 50\%$  are shown here. A discrete Gamma distribution was used to model evolutionary rate differences among sites (5 categories (+G, parameter = 1.0610)). The tree is drawn to scale, with branch lengths measured in the number of substitutions per site. The analysis involved 51 amino acid sequences. All positions containing gaps and missing data were eliminated. There were a total of 252 positions in the final dataset.

## **Co-duplicated group-2**

**E2F, STMN1, EYA\***

**Asterisks (\*)** represent families published previously by our research group (for details see main text).

## E2F Transcription Factor-E2F

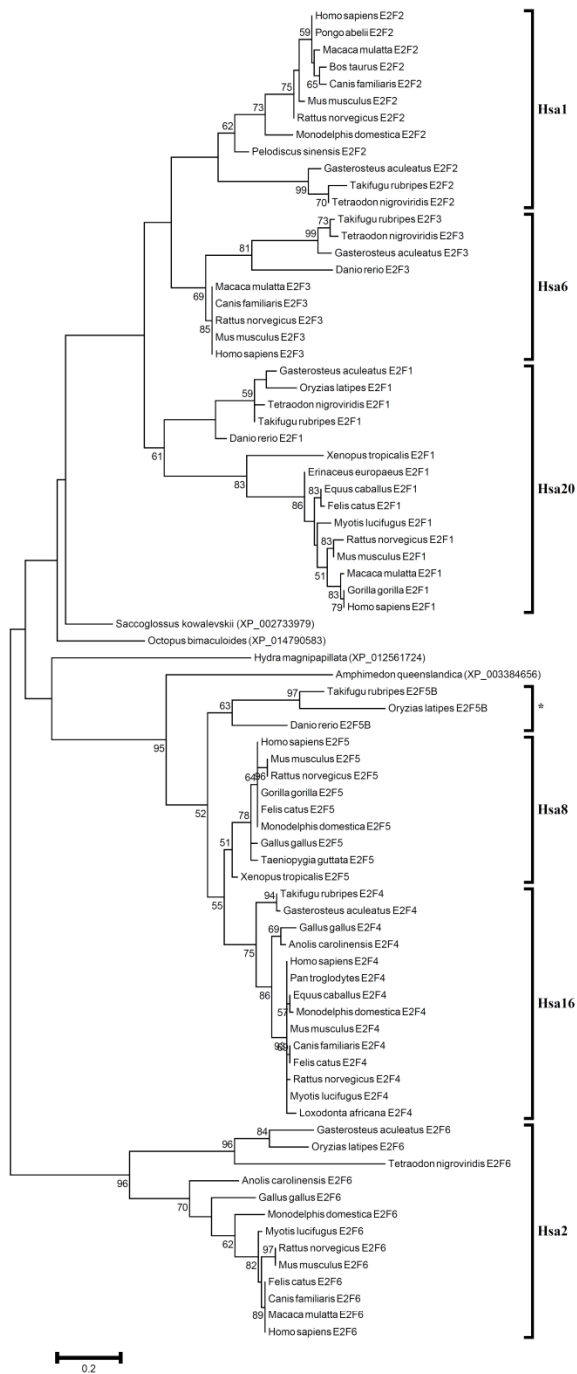

## Phylogenetic tree of E2F family.

The evolutionary history was inferred by using the Maximum Likelihood method based on the Whelan And Goldman model. The tree with the highest log likelihood (-3603.2899) is shown. The percentage of trees in which the associated taxa clustered together is shown next to the branches ; only the values  $\geq 50\%$  are shown here. A discrete Gamma distribution was used to model evolutionary rate differences among sites (5 categories (+G, parameter = 1.4435)). The tree is drawn to scale, with branch lengths measured in the number of substitutions per site. The analysis involved 79 amino acid sequences. All positions containing gaps and missing data were eliminated. There were a total of 84 positions in the final dataset.

## Stathmin-STMN

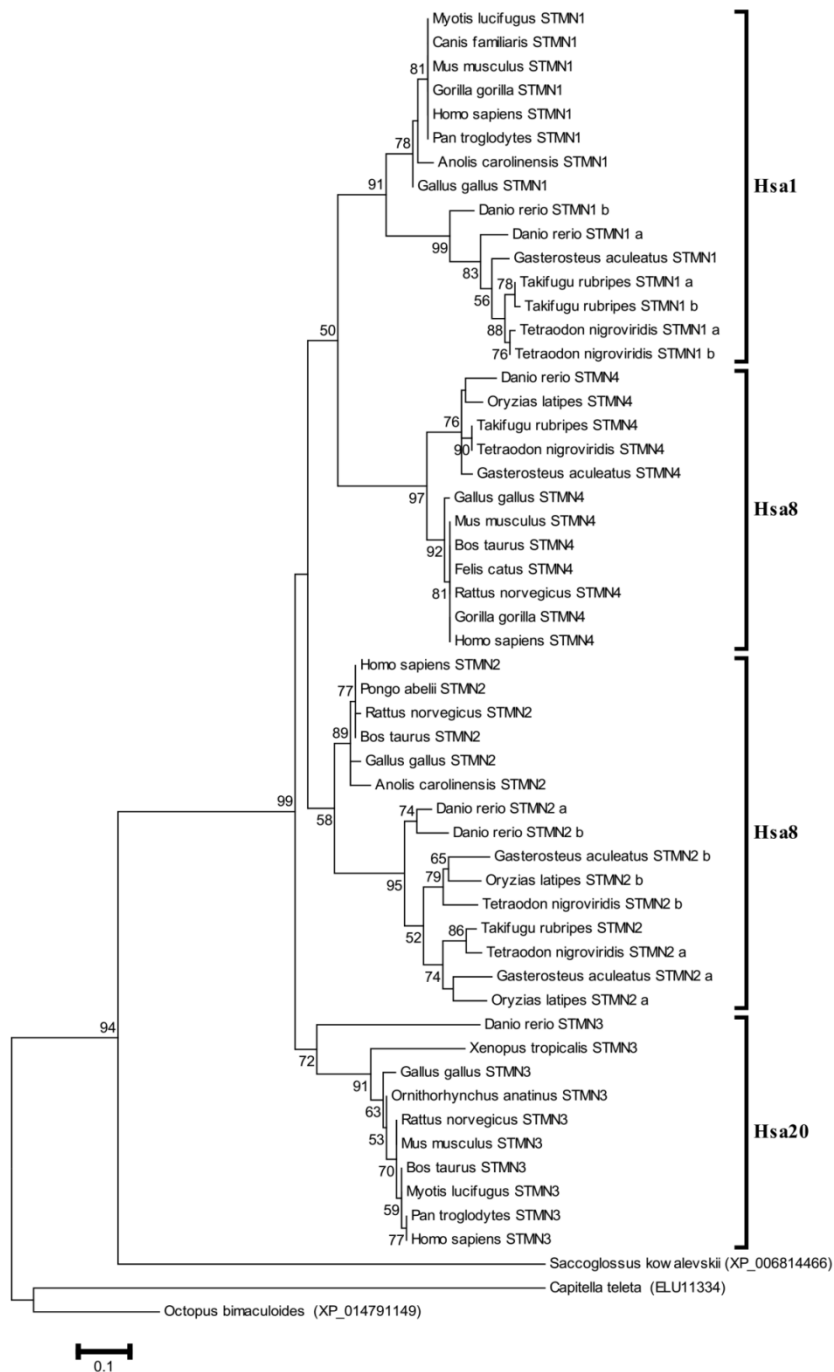

### Phylogenetic tree of STMN family.

The evolutionary history was inferred by using the Maximum Likelihood method based on the Whelan And Goldman model. The tree with the highest log likelihood (-2434.5527) is shown. The percentage of trees in which the associated taxa clustered together is shown next to the branches ; only the values  $\geq 50\%$  are shown here. A discrete Gamma distribution was used to model evolutionary rate differences among sites (5 categories (+G, parameter = 1.7372)). The tree is drawn to scale, with branch lengths measured in the number of substitutions per site. The analysis involved 55 amino acid sequences. All positions containing gaps and missing data were eliminated. There were a total of 107 positions in the final dataset.

### **Co-duplicated group-3**

**HCK\*, DLGAP, NKAIN, KCNQ, MATN4\***

**Asterisks (\*)** represent families published previously by our research group (for details see main text).



## Discs, large *Drosophila* Homolog-associated Protein-DLGAP

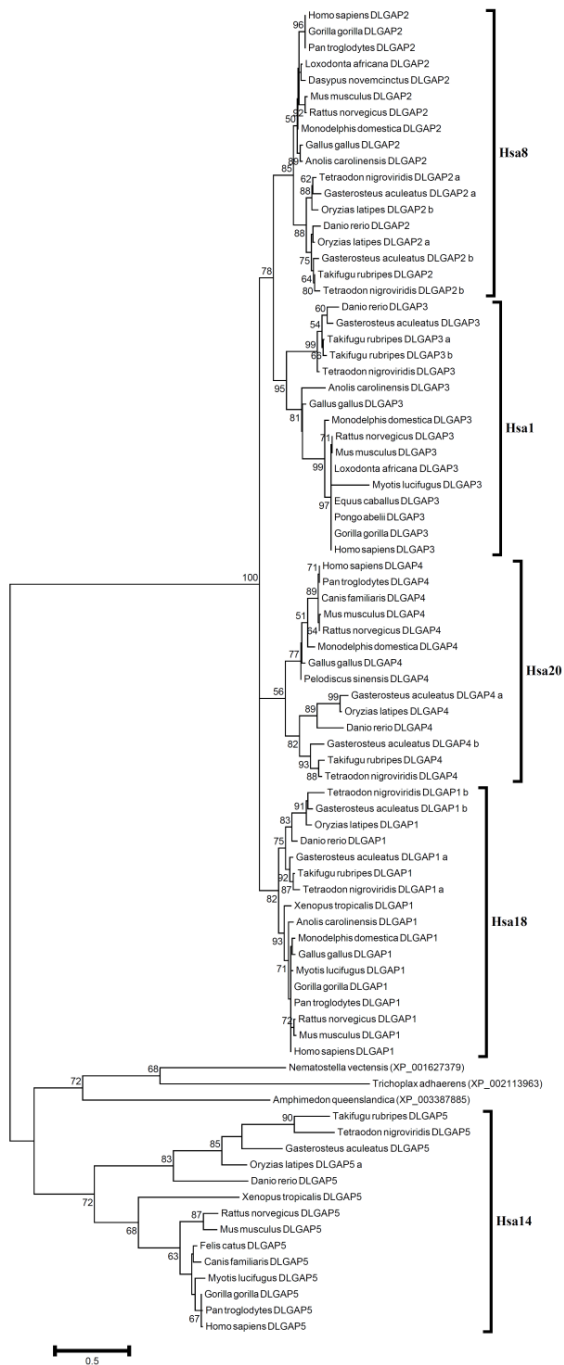

### Phylogenetic tree of DLGAP family.

The evolutionary history was inferred by using the Maximum Likelihood method based on the Whelan And Goldman model. The tree with the highest log likelihood (-7367.7106) is shown. The percentage of trees in which the associated taxa clustered together is shown next to the branches ; only the values  $\geq 50\%$  are shown here. A discrete Gamma distribution was used to model evolutionary rate differences among sites (5 categories (+G, parameter = 4.3659)). The tree is drawn to scale, with branch lengths measured in the number of substitutions per site. The analysis involved 82 amino acid sequences. All positions containing gaps and missing data were eliminated. There were a total of 146 positions in the final dataset.

## Na<sup>+</sup>/K<sup>+</sup> Transporting ATPase Interacting Protein-NKAIN

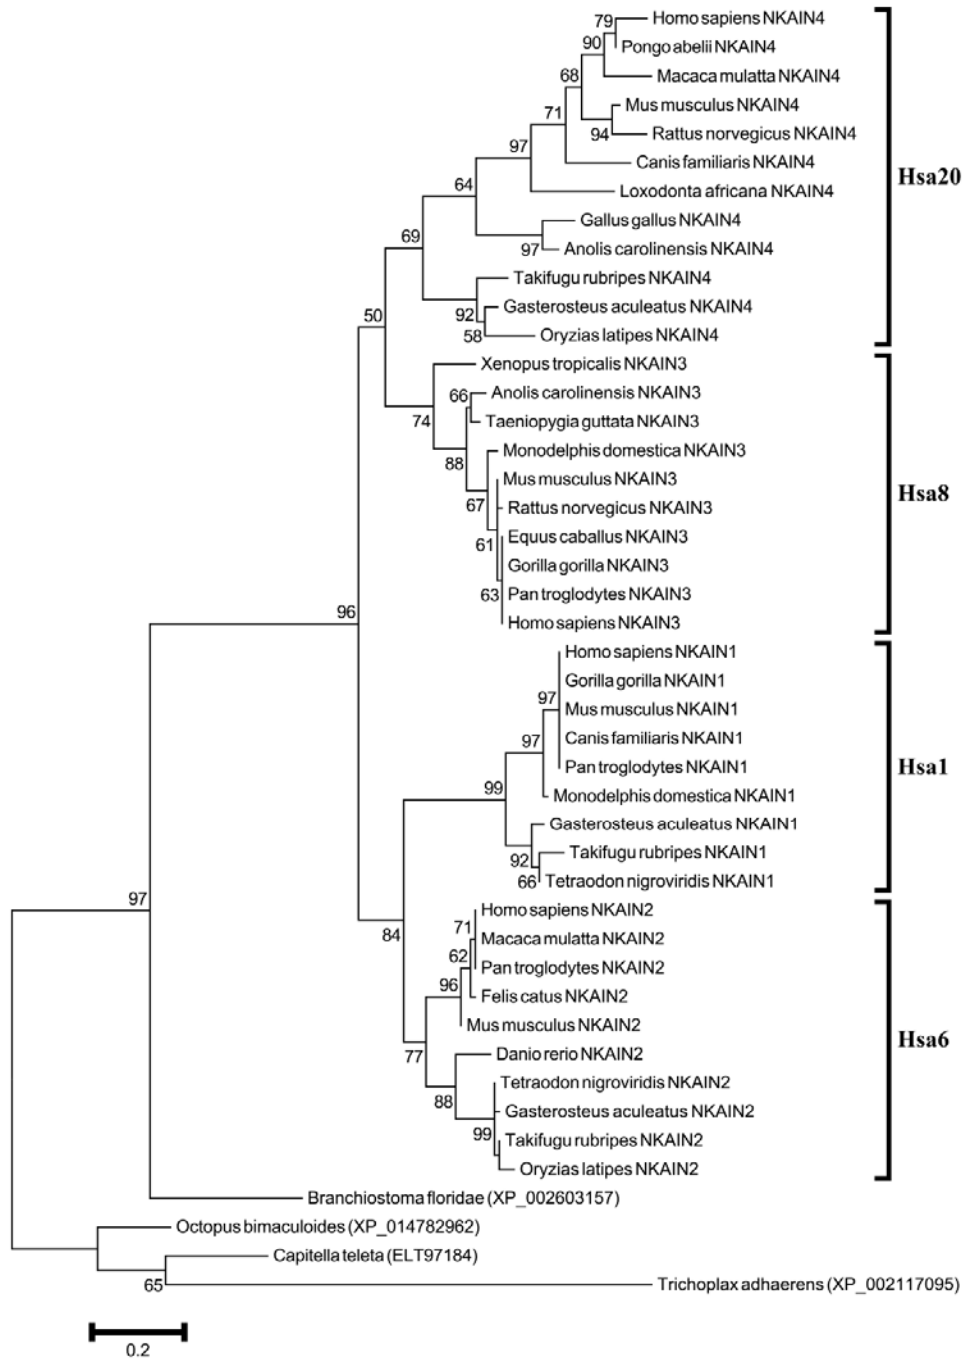

### Phylogenetic tree of NKAIN family.

The evolutionary history was inferred by using the Maximum Likelihood method based on the Whelan And Goldman model. The tree with the highest log likelihood (-2308.7286) is shown. The percentage of trees in which the associated taxa clustered together is shown next to the branches ; only the values  $\geq 50\%$  are shown here. A discrete Gamma distribution was used to model evolutionary rate differences among sites (5 categories (+G, parameter = 1.6036)). The tree is drawn to scale, with branch lengths measured in the number of substitutions per site. The analysis involved 45 amino acid sequences. All positions containing gaps and missing data were eliminated. There were a total of 94 positions in the final dataset.

## Potassium Voltage-Gated Channel subfamily Q-KCNQ

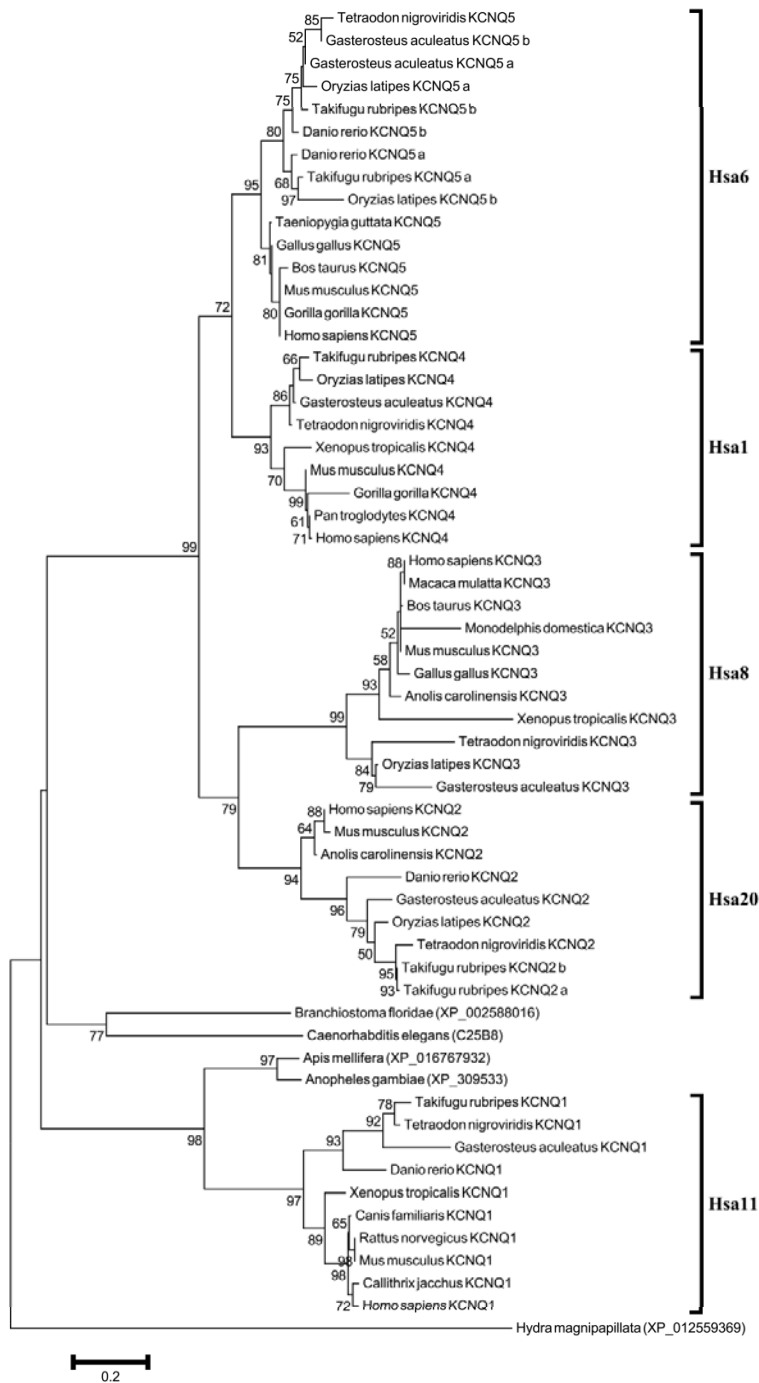

### Phylogenetic tree of KCNQ family.

The evolutionary history was inferred by using the Maximum Likelihood method based on the Whelan And Goldman model. The tree with the highest log likelihood (-6689.7208) is shown. The percentage of trees in which the associated taxa clustered together is shown next to the branches ; only the values  $\geq 50\%$  are shown here. A discrete Gamma distribution was used to model evolutionary rate differences among sites (5 categories (+G, parameter = 1.9925)). The tree is drawn to scale, with branch lengths measured in the number of substitutions per site. The analysis involved 59 amino acid sequences. All positions containing gaps and missing data were eliminated. There were a total of 206 positions in the final dataset.

## **Co-duplicated group-4**

**FAM110, NCOA, KCNS\*, YTHDF, XKR, MYT**

**Asterisks (\*)** represent families published previously by our research group (for details see main text).

**Family with Sequence Similarity 110-FAM110**

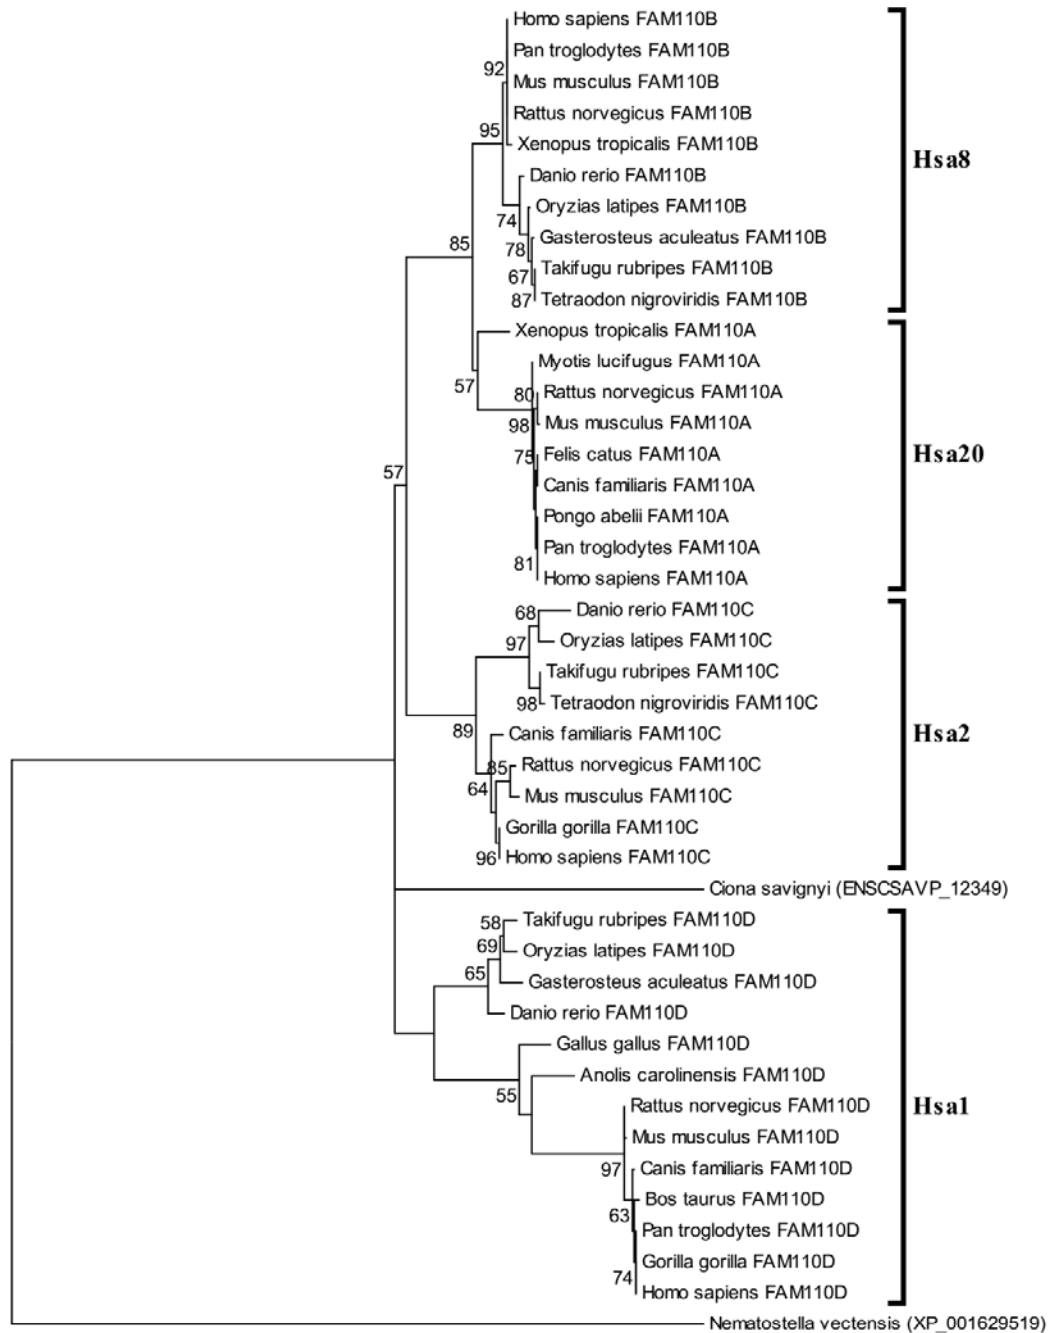

**Phylogenetic tree of FAM110 family.**

The evolutionary history was inferred by using the Maximum Likelihood method based on the Whelan And Goldman model. The tree with the highest log likelihood (-2939.3885) is shown. The percentage of trees in which the associated taxa clustered together is shown next to the branches ; only the values  $\geq 50\%$  are shown here. A discrete Gamma distribution was used to model evolutionary rate differences among sites (5 categories (+G, parameter = 4.3955)). The tree is drawn to scale, with branch lengths measured in the number of substitutions per site. The analysis involved 43 amino acid sequences. All positions containing gaps and missing data were eliminated. There were a total of 95 positions in the final dataset.

## Nuclear Receptor Coactivator-NCOA

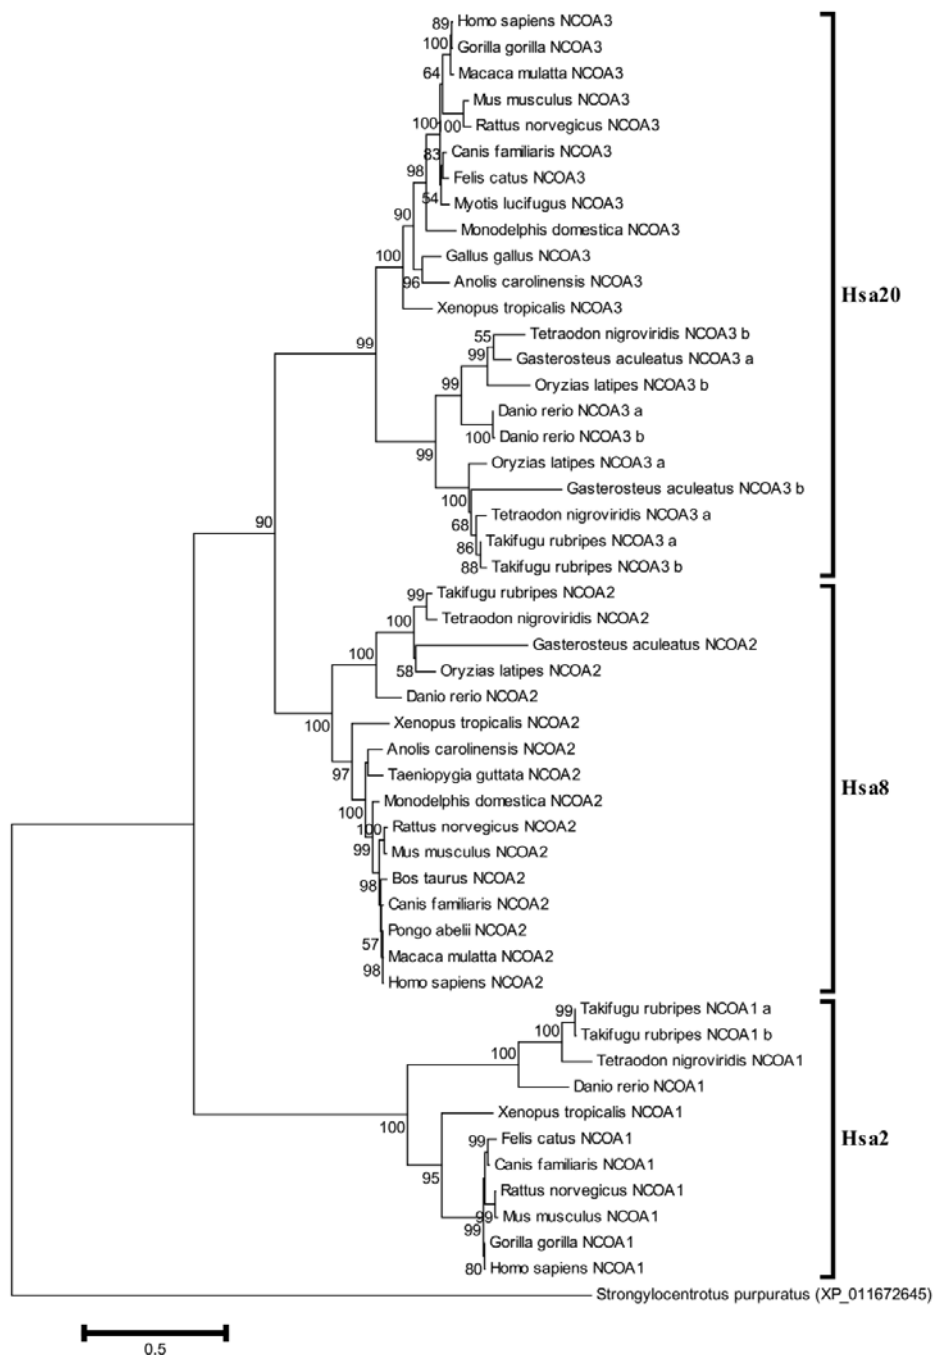

### Phylogenetic tree of NCOA family.

The evolutionary history was inferred by using the Maximum Likelihood method based on the Whelan And Goldman model. The tree with the highest log likelihood (-24506.3558) is shown. The percentage of trees in which the associated taxa clustered together is shown next to the branches ; only the values  $\geq 50\%$  are shown here. A discrete Gamma distribution was used to model evolutionary rate differences among sites (5 categories (+G, parameter = 2.7804)). The tree is drawn to scale, with branch lengths measured in the number of substitutions per site. The analysis involved 50 amino acid sequences. All positions containing gaps and missing data were eliminated. There were a total of 747 positions in the final dataset.

## YTH Domain-Containing Family Protein-YTHDF

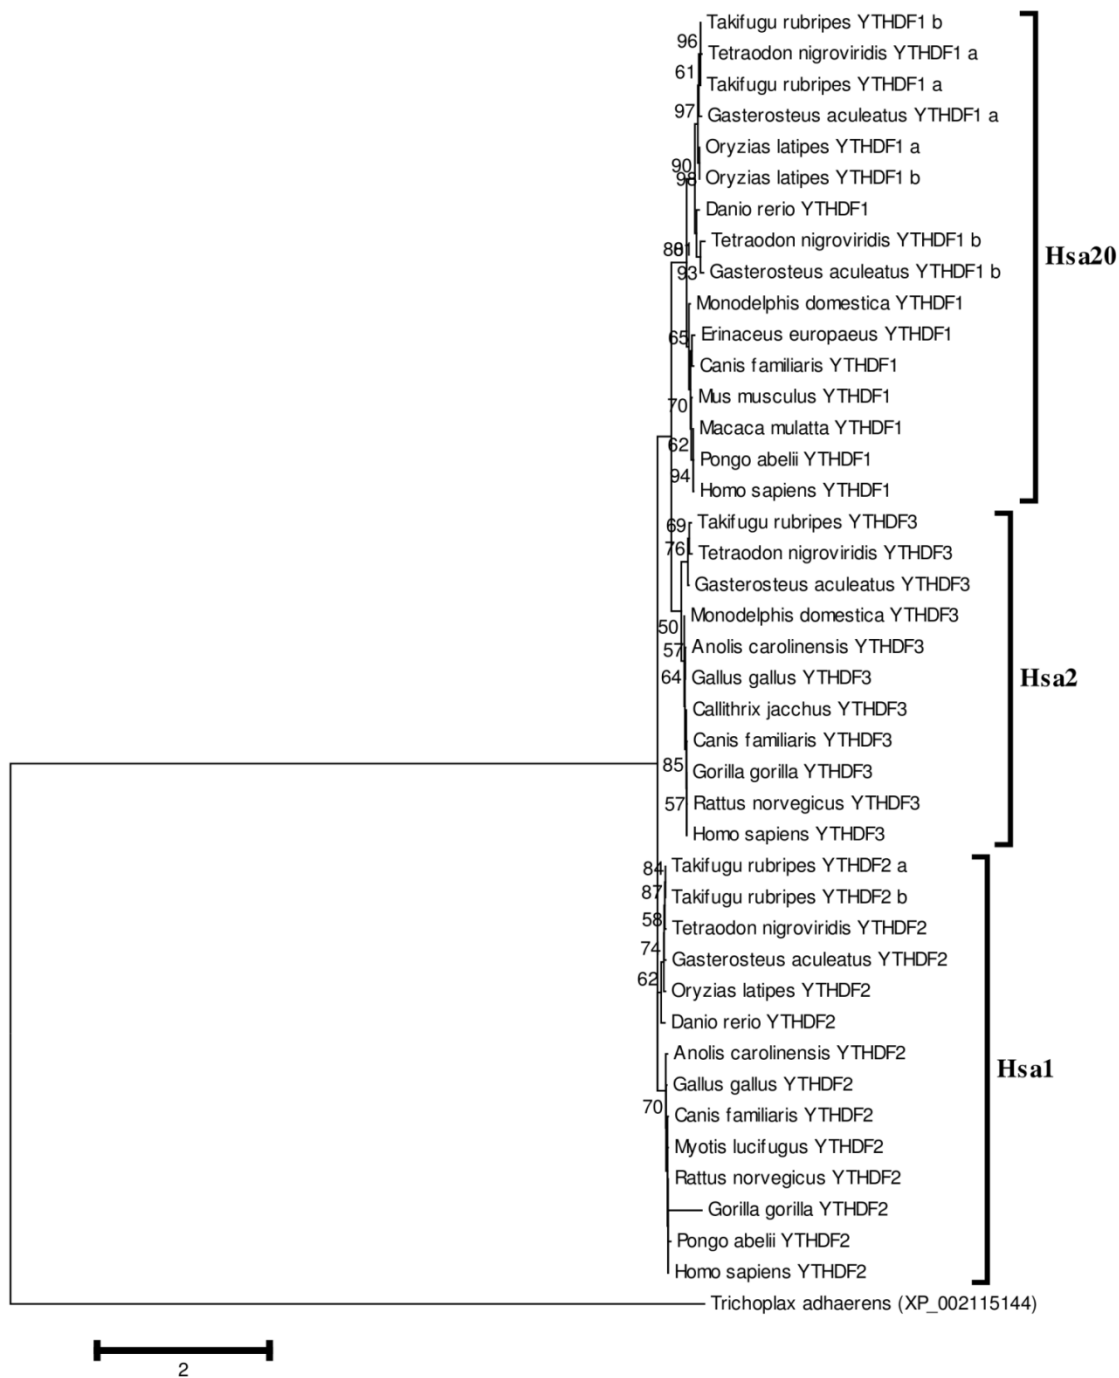

### Phylogenetic tree of YTHDF family.

The evolutionary history was inferred by using the Maximum Likelihood method based on the Whelan And Goldman model. The tree with the highest log likelihood (-4540.4192) is shown. The percentage of trees in which the associated taxa clustered together is shown next to the branches ; only the values  $\geq 50\%$  are shown here. A discrete Gamma distribution was used to model evolutionary rate differences among sites (5 categories (+G, parameter = 3.5033)). The tree is drawn to scale, with branch lengths measured in the number of substitutions per site. The analysis involved 42 amino acid sequences. All positions containing gaps and missing data were eliminated. There were a total of 293 positions in the final dataset.

## X Kell Blood Group Precursor-related Family-XKR

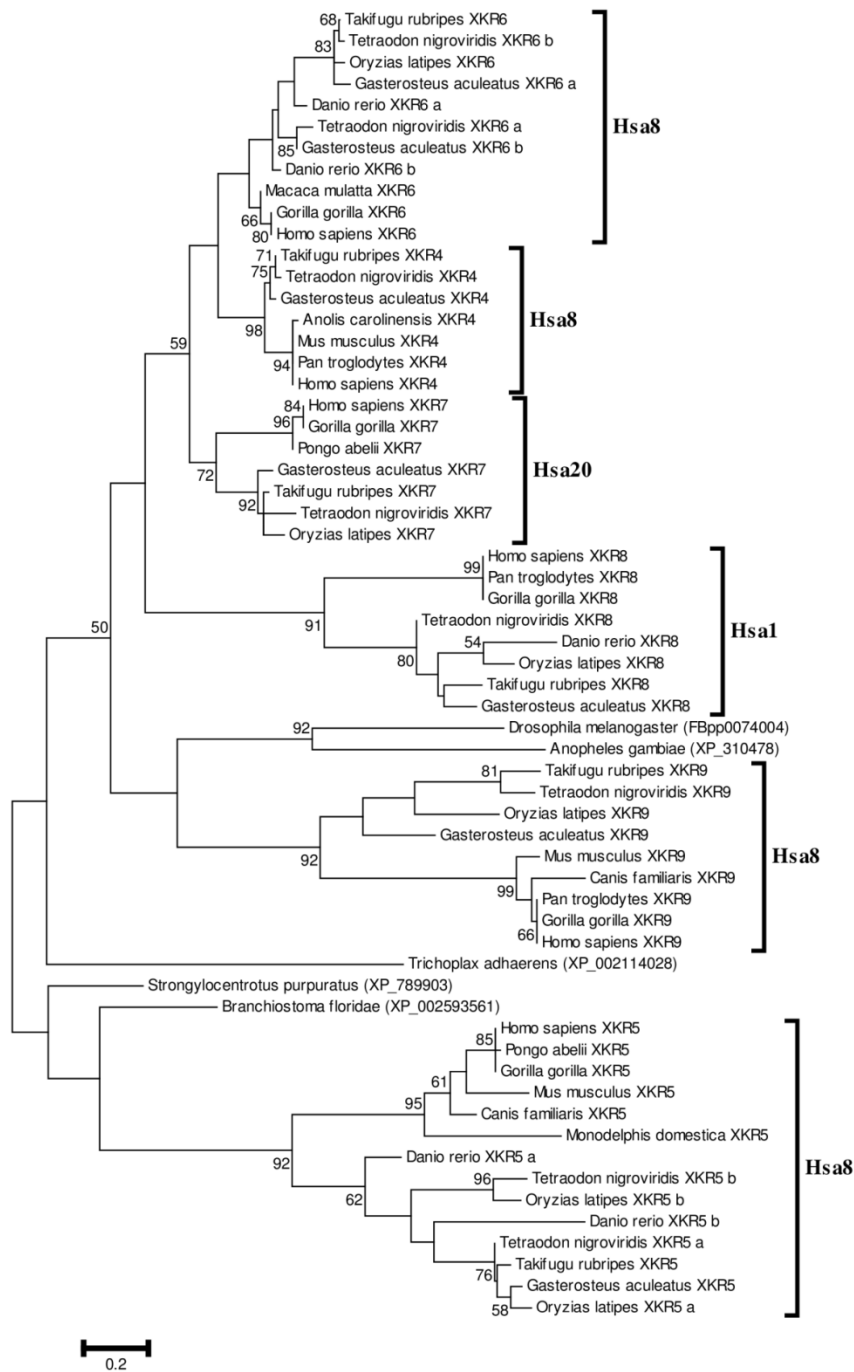

### Phylogenetic tree of XKR family.

The evolutionary history was inferred by using the Maximum Likelihood method based on the Whelan And Goldman model. The tree with the highest log likelihood (-3313.2103) is shown. The percentage of trees in which the associated taxa clustered together is shown next to the branches ; only the values  $\geq 50\%$  are shown here. A discrete Gamma distribution was used to model evolutionary rate differences among sites (5 categories (+G, parameter = 3.1313)). The tree is drawn to scale, with branch lengths measured in the number of substitutions per site. The analysis involved 61 amino acid sequences. All positions containing gaps and missing data were eliminated. There were a total of 67 positions in the final dataset.



## Myelin Transcription Factor-MYT

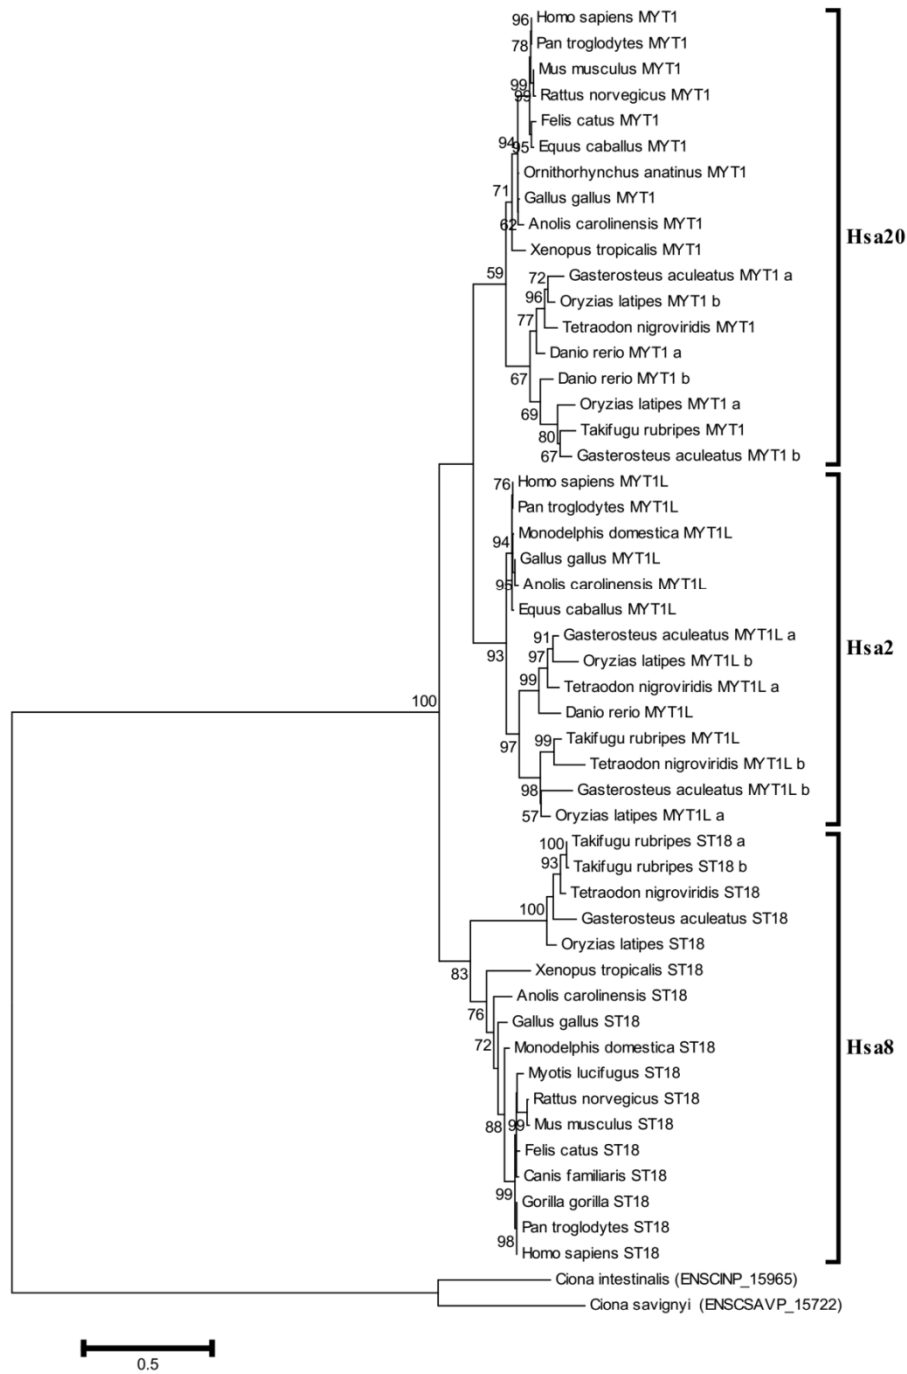

## Phylogenetic tree of MYT family.

The evolutionary history was inferred by using the Maximum Likelihood method based on the Whelan And Goldman model. The tree with the highest log likelihood (-11734.7917) is shown. The percentage of trees in which the associated taxa clustered together is shown next to the branches ; only the values  $\geq 50\%$  are shown here. A discrete Gamma distribution was used to model evolutionary rate differences among sites (5 categories (+G, parameter = 2.3022)). The tree is drawn to scale, with branch lengths measured in the number of substitutions per site. The analysis involved 51 amino acid sequences. All positions containing gaps and missing data were eliminated. There were a total of 469 positions in the final dataset.

**Other gene families analyzed in the present study**

## Antizyme Inhibitor-AZIN

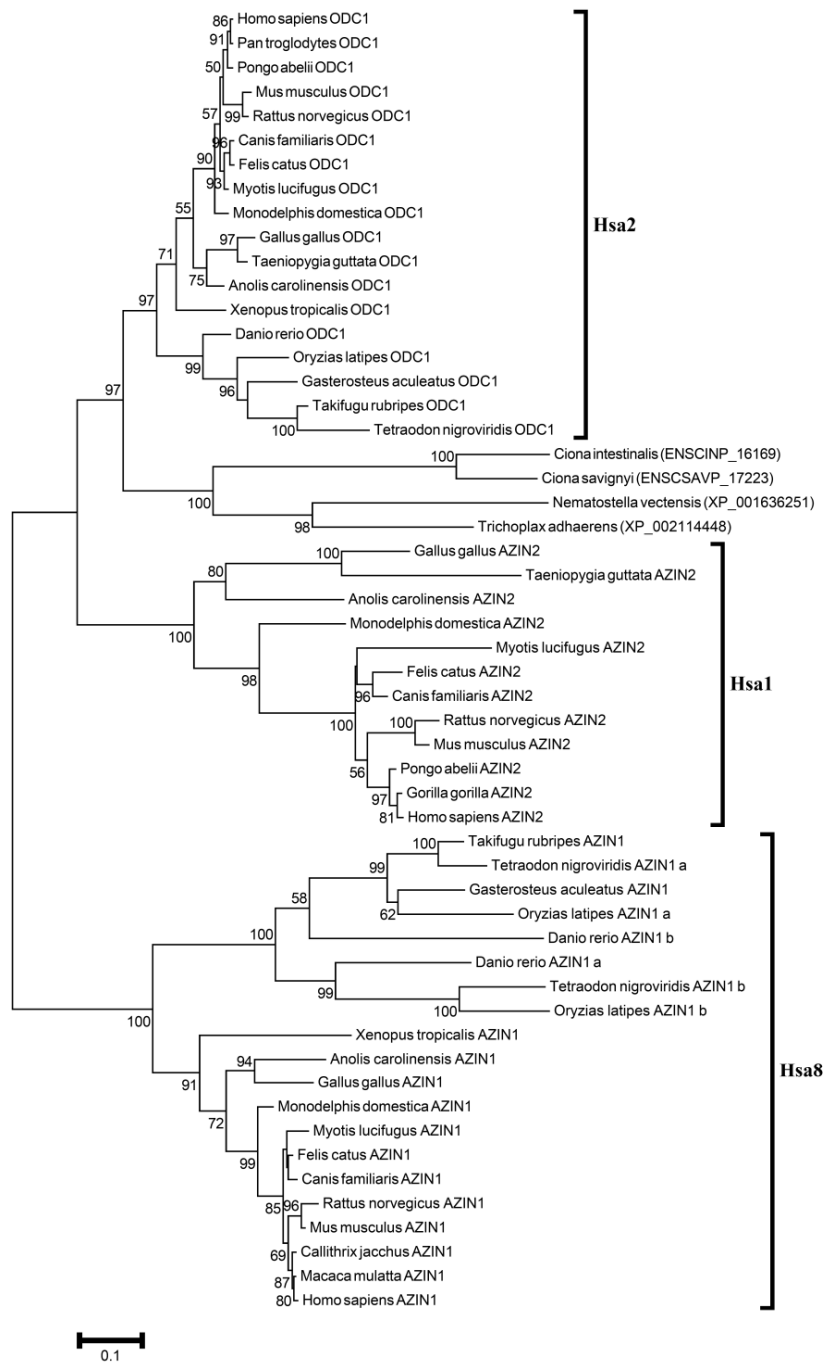

## Phylogenetic tree of AZIN family.

The evolutionary history was inferred by using the Maximum Likelihood method based on the Whelan And Goldman model . The tree with the highest log likelihood (-11900.2271) is shown. The percentage of trees in which the associated taxa clustered together is shown next to the branches; only the values  $\geq 50\%$  are shown here. A discrete Gamma distribution was used to model evolutionary rate differences among sites (5 categories (+G, parameter = 2.2632)). The tree is drawn to scale, with branch lengths measured in the number of substitutions per site. The analysis involved 54 amino acid sequences. All positions containing gaps and missing data were eliminated. There were a total of 327 positions in the final dataset.



**Ciliary Rootlet Coiled-Coil Protein-CRO**

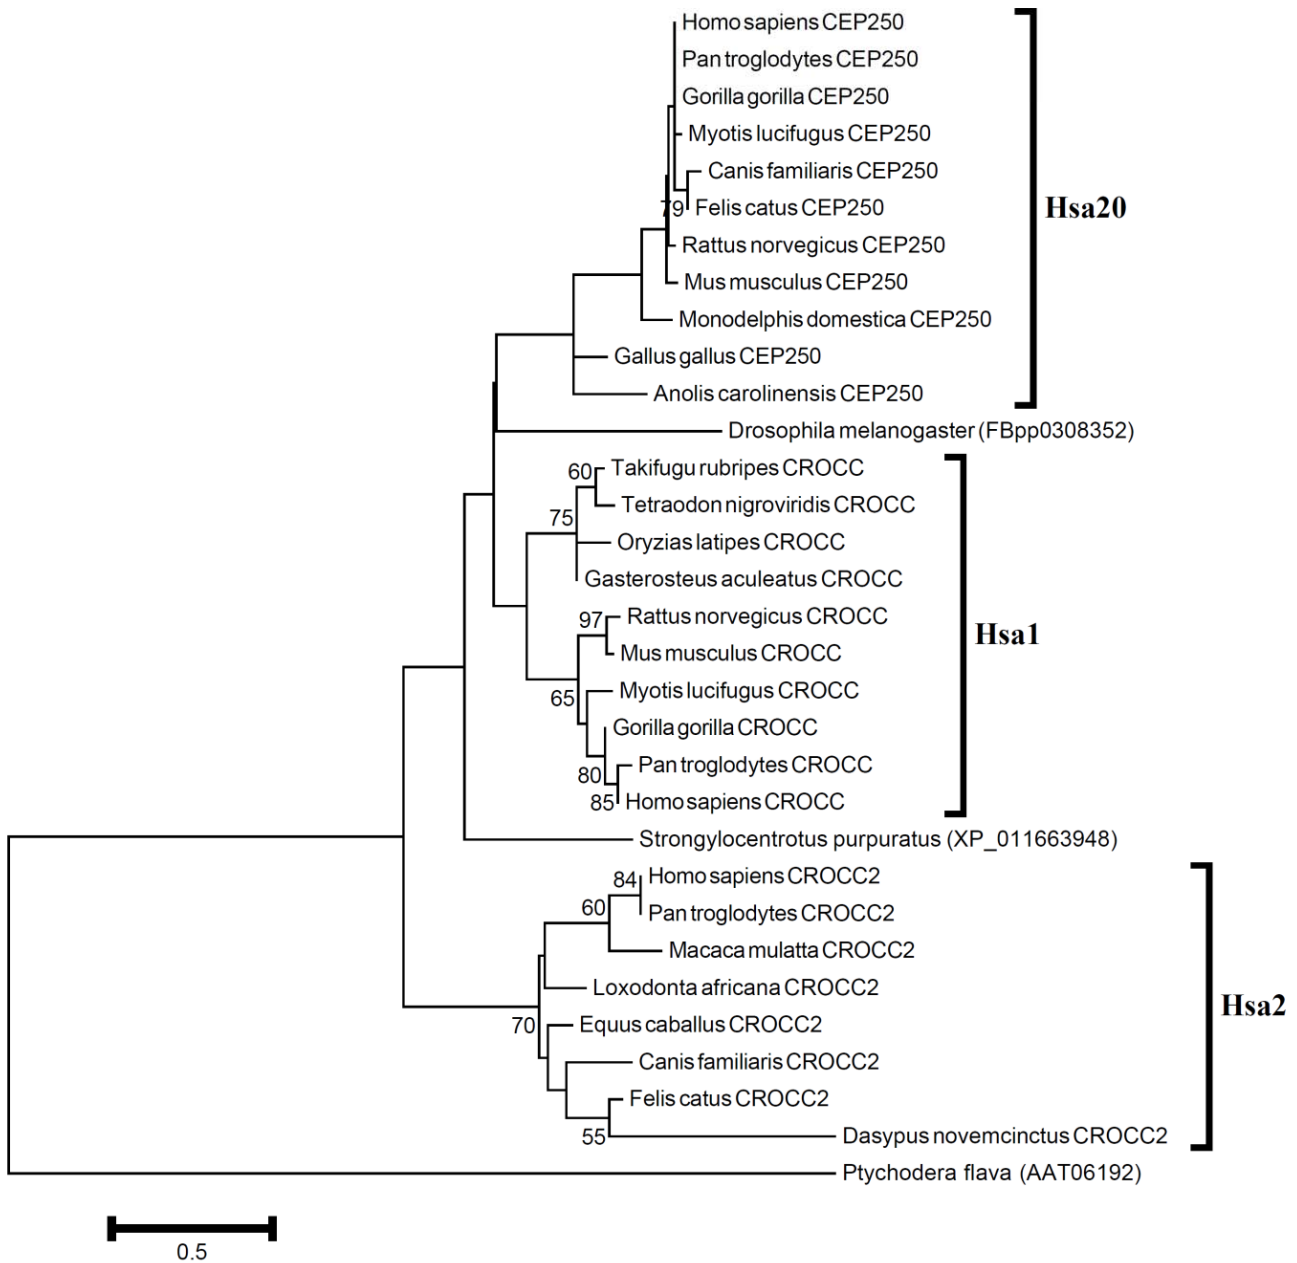

**Phylogenetic tree of CRO family.**

The evolutionary history was inferred by using the Maximum Likelihood method based on the Whelan And Goldman model. The tree with the highest log likelihood (-1419.2573) is shown. The percentage of trees in which the associated taxa clustered together is shown next to the branches ; only the values  $\geq 50\%$  are shown here. A discrete Gamma distribution was used to model evolutionary rate differences among sites (5 categories (+G, parameter = 7.5189)). The tree is drawn to scale, with branch lengths measured in the number of substitutions per site. The analysis involved 32 amino acid sequences. All positions containing gaps and missing data were eliminated. There were a total of 49 positions in the final dataset.

## Grainyhead like Transcription factor-GRHL

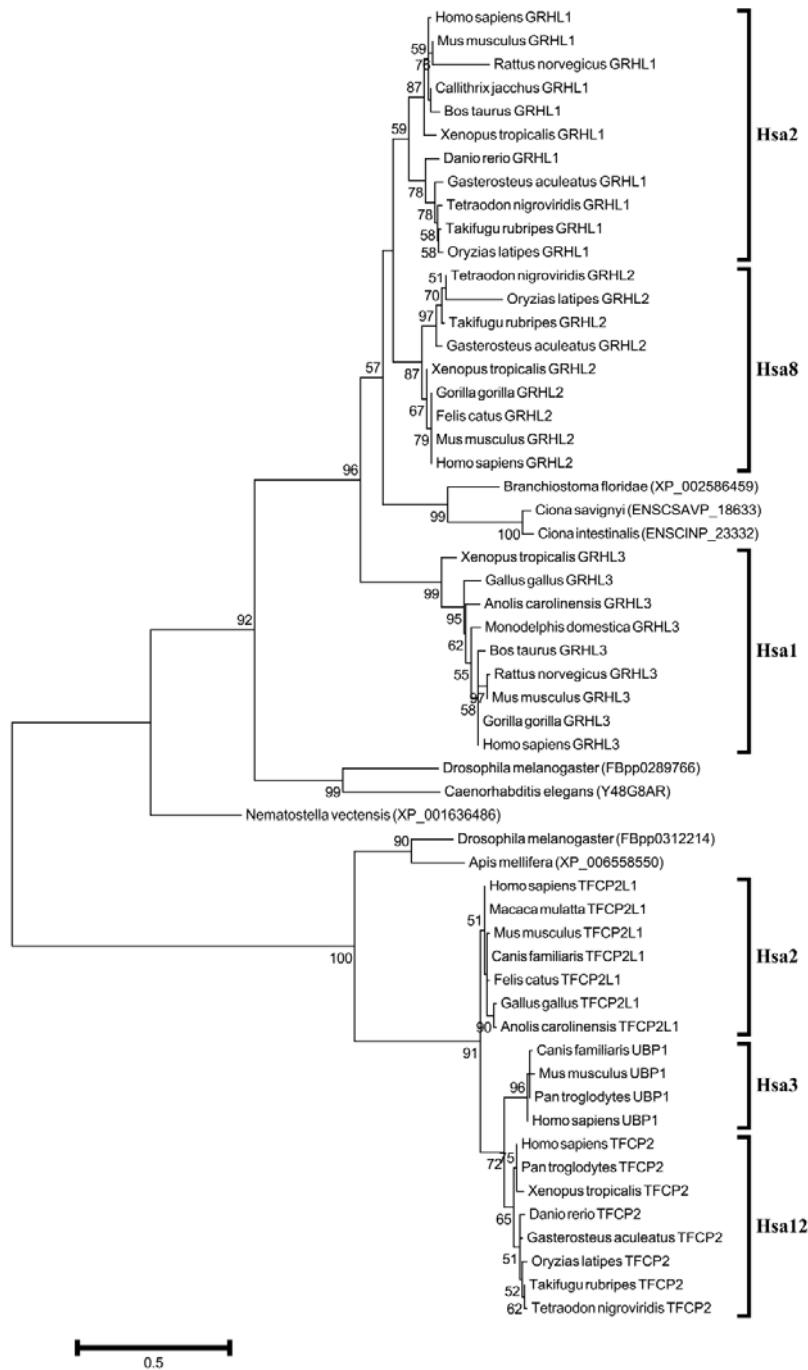

**Phylogenetic tree of GRHL family.**

The evolutionary history was inferred by using the Maximum Likelihood method based on the Whelan And Goldman model. The tree with the highest log likelihood (-3783.1102) is shown. The percentage of trees in which the associated taxa clustered together is shown next to the branches ; only the values  $\geq 50\%$  are shown here. A discrete Gamma distribution was used to model evolutionary rate differences among sites (5 categories (+G, parameter = 2.6106)). The tree is drawn to scale, with branch lengths measured in the number of substitutions per site. The analysis involved 56 amino acid sequences. All positions containing gaps and missing data were eliminated. There were a total of 146 positions in the final dataset.

## Inhibitor of DNA Binding protein-ID

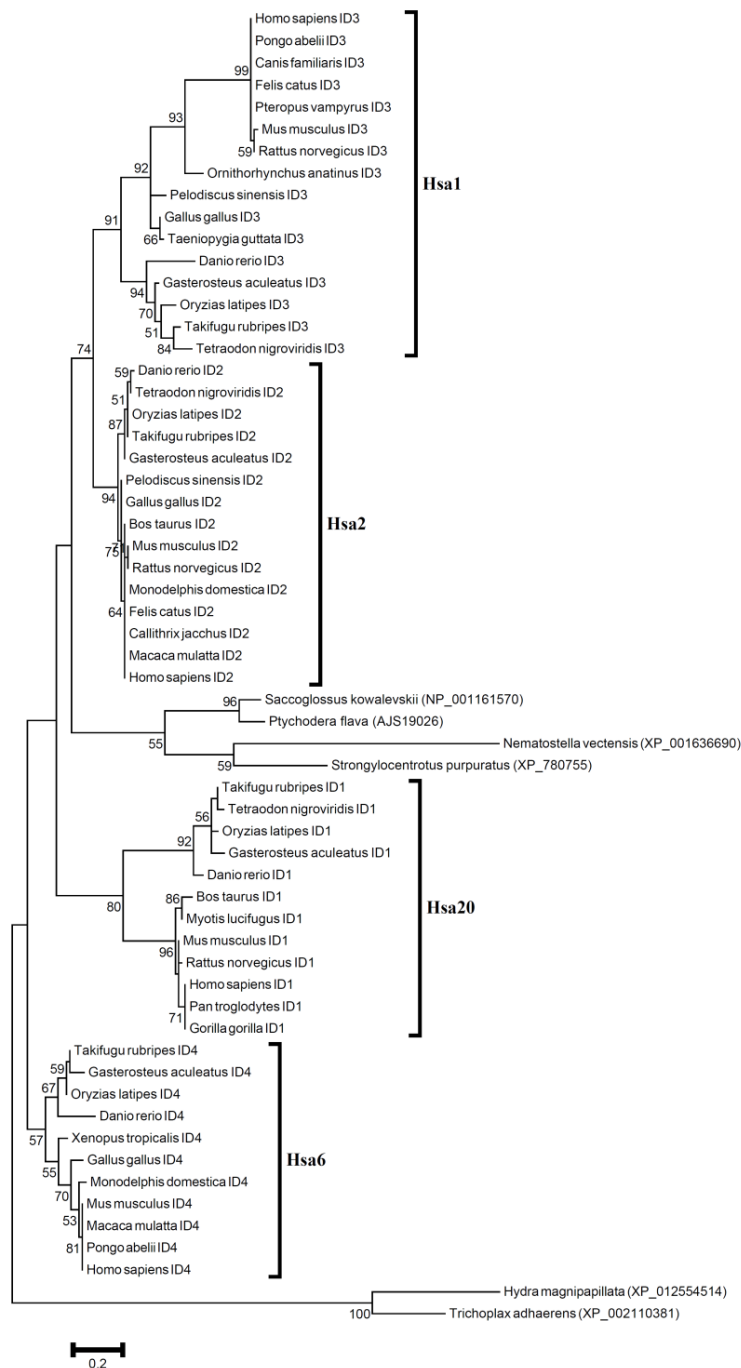

### Phylogenetic tree of ID family.

The evolutionary history was inferred by using the Maximum Likelihood method based on the Whelan And Goldman model. The tree with the highest log likelihood (-2160.3041) is shown. The percentage of trees in which the associated taxa clustered together is shown next to the branches ; only the values  $\geq 50\%$  are shown here . A discrete Gamma distribution was used to model evolutionary rate differences among sites (5 categories (+G, parameter = 2.0164)). The tree is drawn to scale, with branch lengths measured in the number of substitutions per site. The analysis involved 60 amino acid sequences. All positions containing gaps and missing data were eliminated. There were a total of 71 positions in the final dataset.

## Regulator of G-protein Signaling-RGS

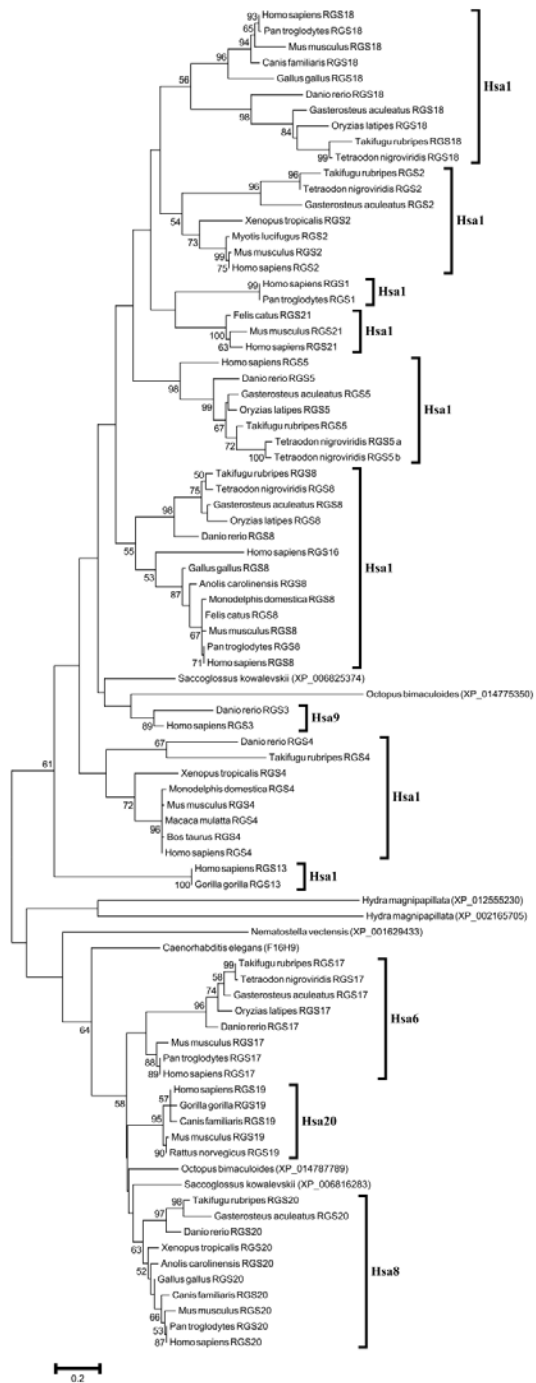

### Phylogenetic tree of RGS family.

The evolutionary history was inferred by using the Maximum Likelihood method based on the Whelan And Goldman model. The tree with the highest log likelihood (-7082.8656) is shown. The percentage of trees in which the associated taxa clustered together is shown next to the branches ; only the values  $\geq 50\%$  are shown here. A discrete Gamma distribution was used to model evolutionary rate differences among sites (5 categories (+G, parameter = 1.9111)). The tree is drawn to scale, with branch lengths measured in the number of substitutions per site. The analysis involved 85 amino acid sequences. All positions containing gaps and missing data were eliminated. There were a total of 115 positions in the final dataset.



## Regulating Synaptic Membrane Exocytosis Protein-RIMS

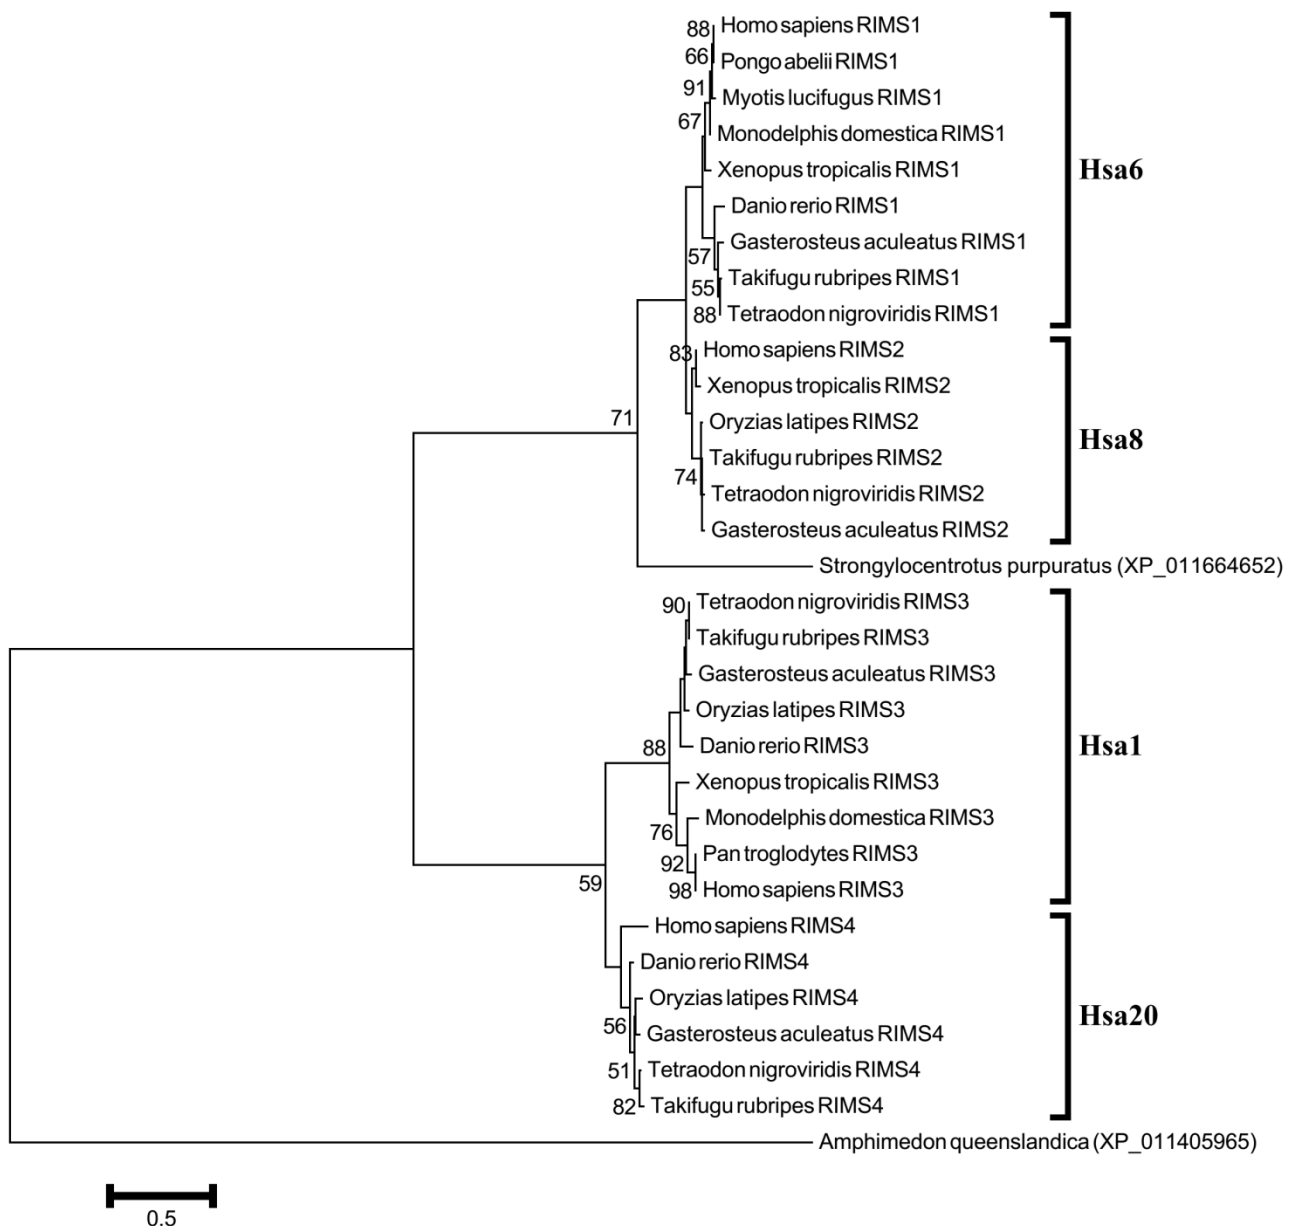

### Phylogenetic tree of RIMS family.

The evolutionary history was inferred by using the Maximum Likelihood method based on the Whelan And Goldman model. The tree with the highest log likelihood (-3878.5361) is shown. The percentage of trees in which the associated taxa clustered together is shown next to the branches ; only the values  $\geq 50\%$  are shown here. A discrete Gamma distribution was used to model evolutionary rate differences among sites (5 categories (+G, parameter = 8.5411)). The tree is drawn to scale, with branch lengths measured in the number of substitutions per site. The analysis involved 32 amino acid sequences. All positions containing gaps and missing data were eliminated. There were a total of 211 positions in the final dataset.

## R-Spondin Homolog-RSPO

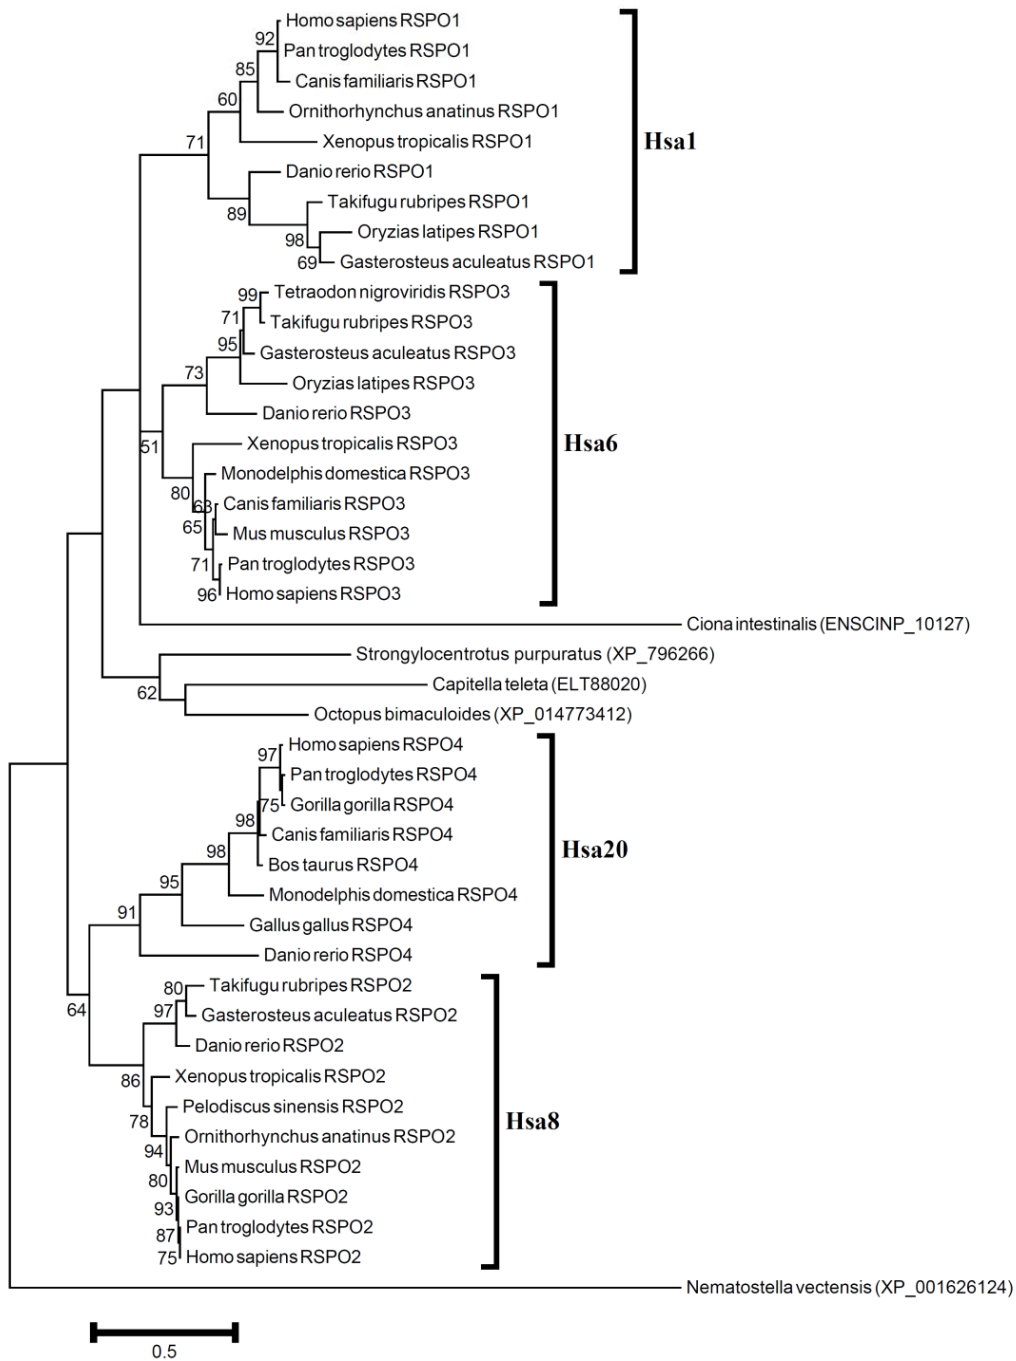

### Phylogenetic tree of RSPO family.

The evolutionary history was inferred by using the Maximum Likelihood method based on the Whelan And Goldman model. The tree with the highest log likelihood (-5260.9960) is shown. The percentage of trees in which the associated taxa clustered together is shown next to the branches ; only the values  $\geq 50\%$  are shown here. A discrete Gamma distribution was used to model evolutionary rate differences among sites (5 categories (+G, parameter = 2.6368)). The tree is drawn to scale, with branch lengths measured in the number of substitutions per site. The analysis involved 43 amino acid sequences. All positions containing gaps and missing data were eliminated. There were a total of 141 positions in the final dataset.

## Solute Carrier Family -SLC

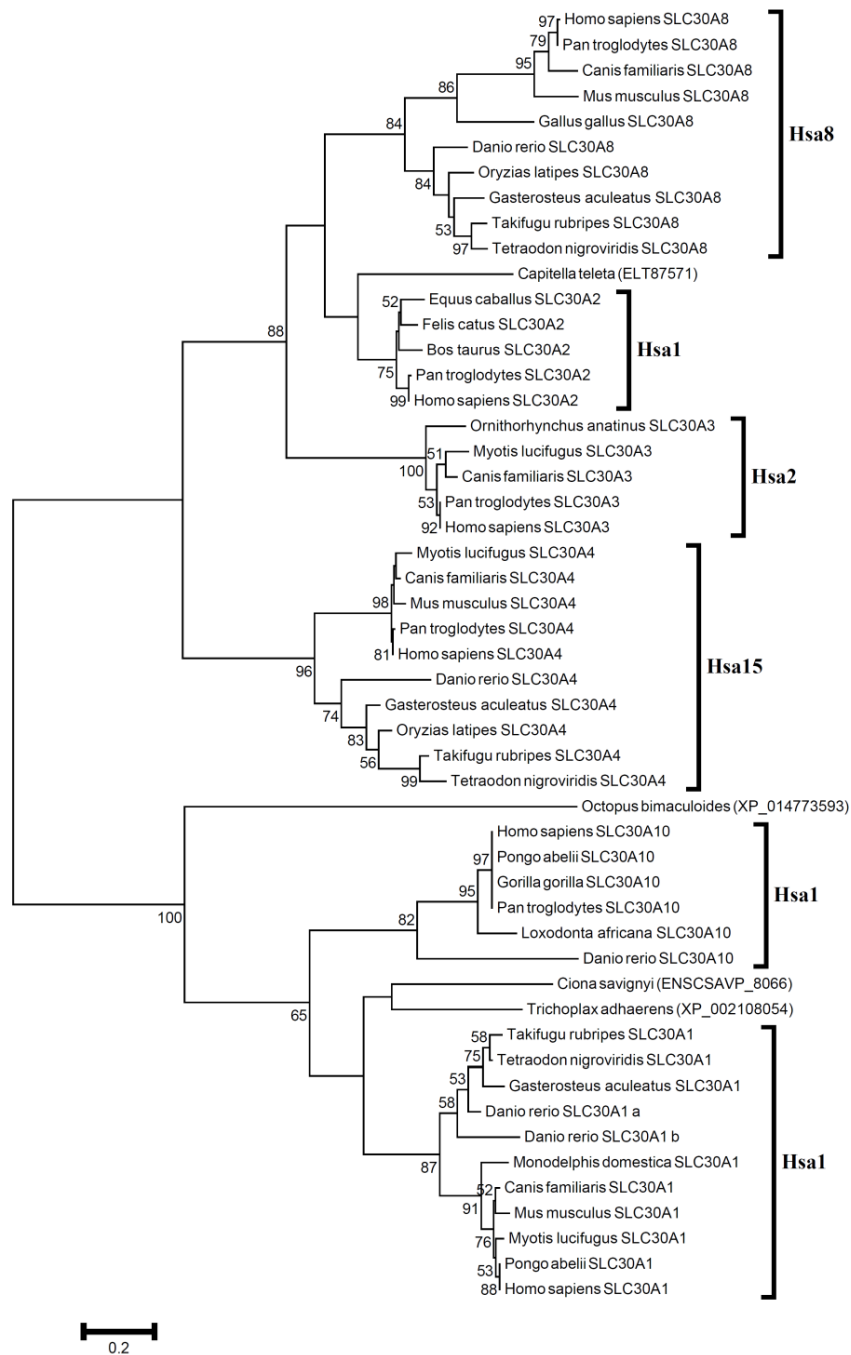

### Phylogenetic tree of SLC family.

The evolutionary history was inferred by using the Maximum Likelihood method based on the Whelan And Goldman model. The tree with the highest log likelihood (-4999.4232) is shown. The percentage of trees in which the associated taxa clustered together is shown next to the branches ; only the values  $\geq 50\%$  are shown here. A discrete Gamma distribution was used to model evolutionary rate differences among sites (5 categories (+G, parameter = 2.3472)). The tree is drawn to scale, with branch lengths measured in the number of substitutions per site. The analysis involved 68 amino acid sequences. All positions containing gaps and missing data were eliminated. There were a total of 131 positions in the final dataset.

## Syntrophin, Gamma-SNT

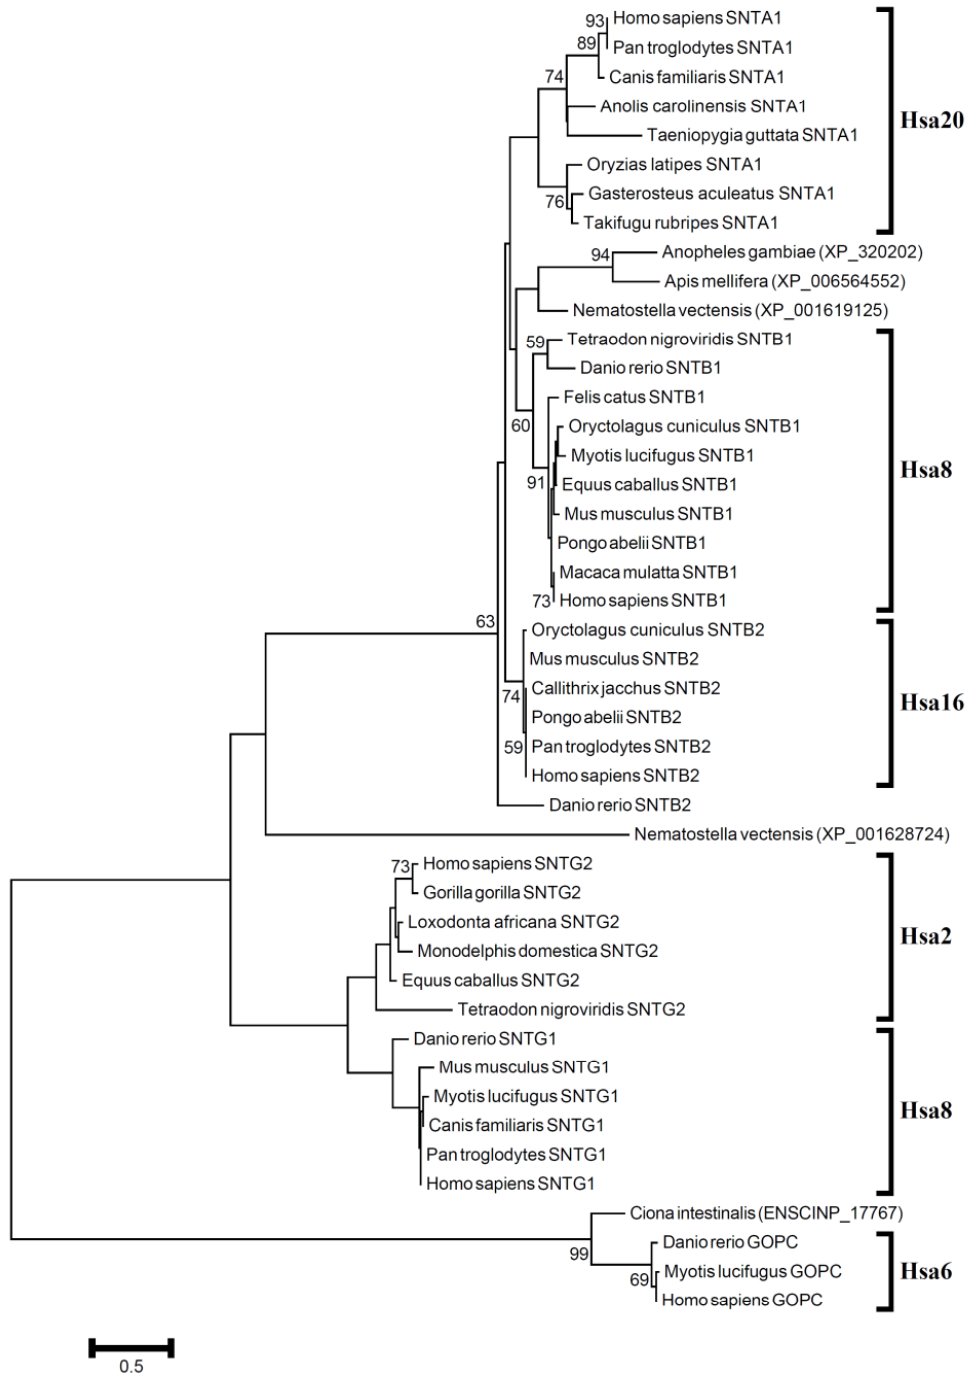

### Phylogenetic tree of SNT family.

The evolutionary history was inferred by using the Maximum Likelihood method based on the Whelan And Goldman model. The tree with the highest log likelihood (-2524.4722) is shown. The percentage of trees in which the associated taxa clustered together is shown next to the branches ; only the values  $\geq 50\%$  are shown here. A discrete Gamma distribution was used to model evolutionary rate differences among sites (5 categories (+G, parameter = 5.9303)). The tree is drawn to scale, with branch lengths measured in the number of substitutions per site. The analysis involved 45 amino acid sequences. All positions containing gaps and missing data were eliminated. There were a total of 67 positions in the final dataset.

## Sorting Nexin Family-SNX

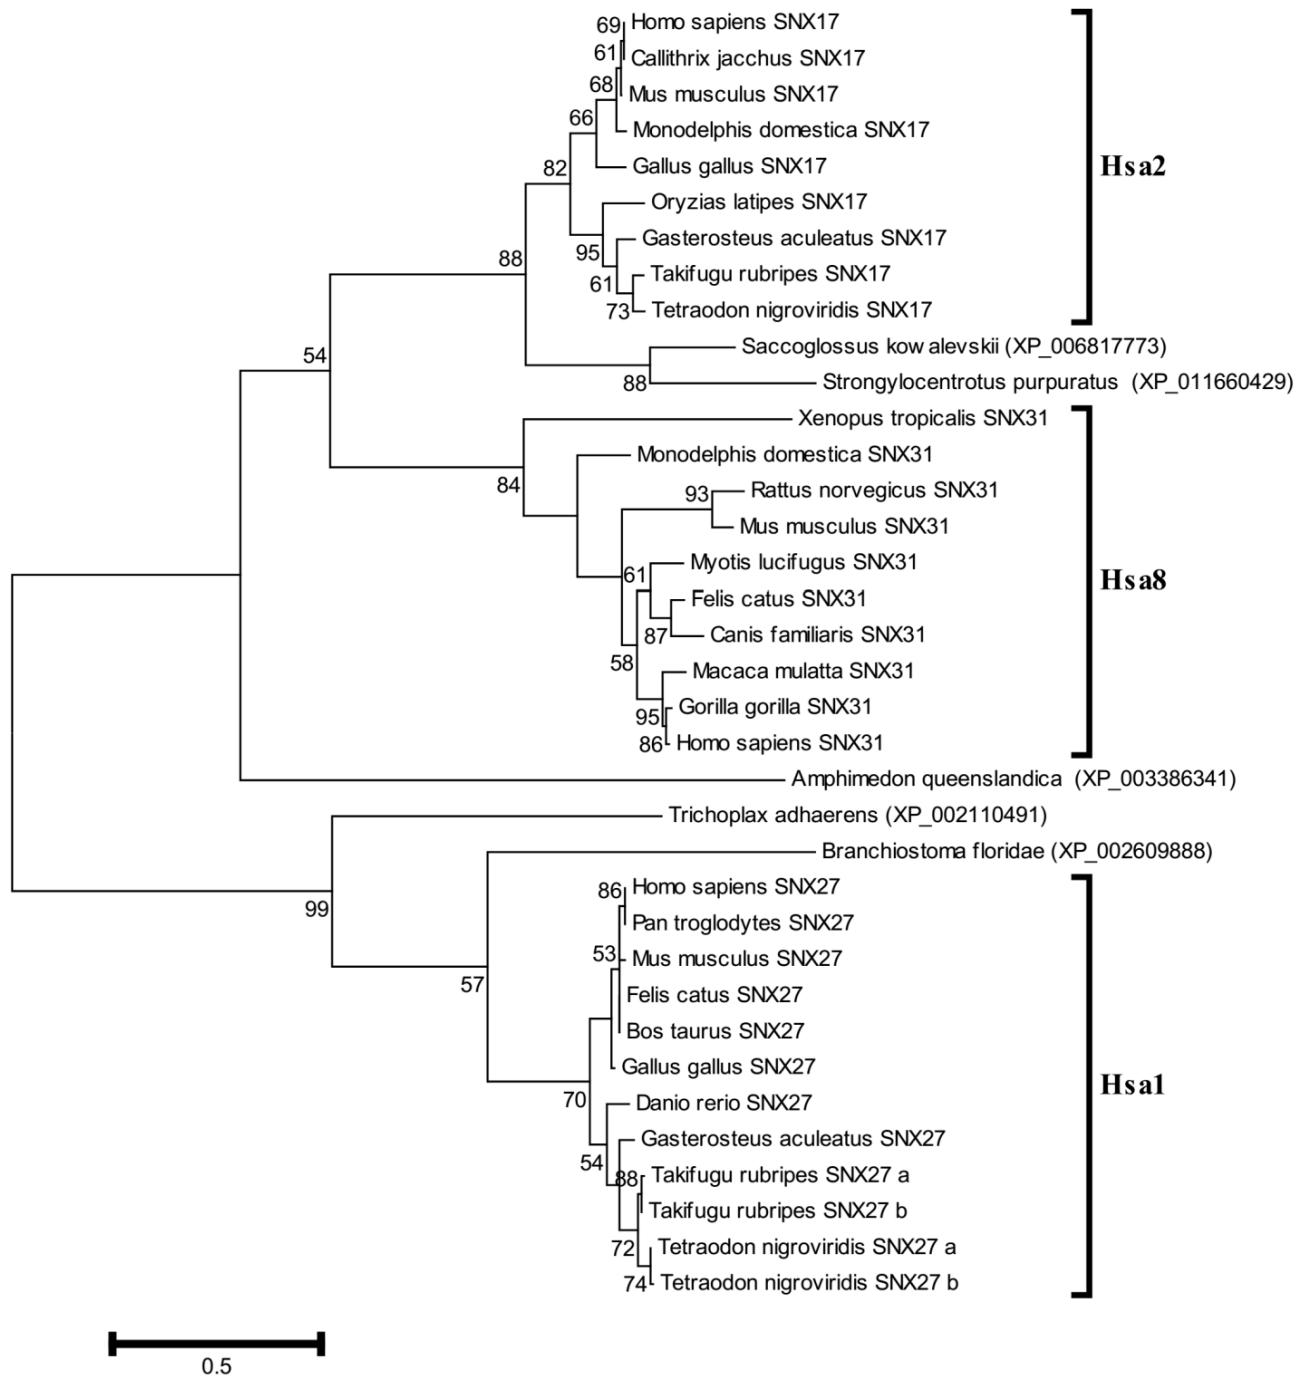

**Phylogenetic tree of SNX family.**

The evolutionary history was inferred by using the Maximum Likelihood method based on the Whelan And Goldman model. The tree with the highest log likelihood (-4476.6316) is shown. The percentage of trees in which the associated taxa clustered together is shown next to the branches ; only the values  $\geq 50\%$  are shown here. A discrete Gamma distribution was used to model evolutionary rate differences among sites (5 categories (+G, parameter = 5.5801)). The tree is drawn to scale, with branch lengths measured in the number of substitutions per site. The analysis involved 36 amino acid sequences. All positions containing gaps and missing data were eliminated. There were a total of 153 positions in the final dataset.

**Transcription Elongation factor A (SII) Protein-TCEA**

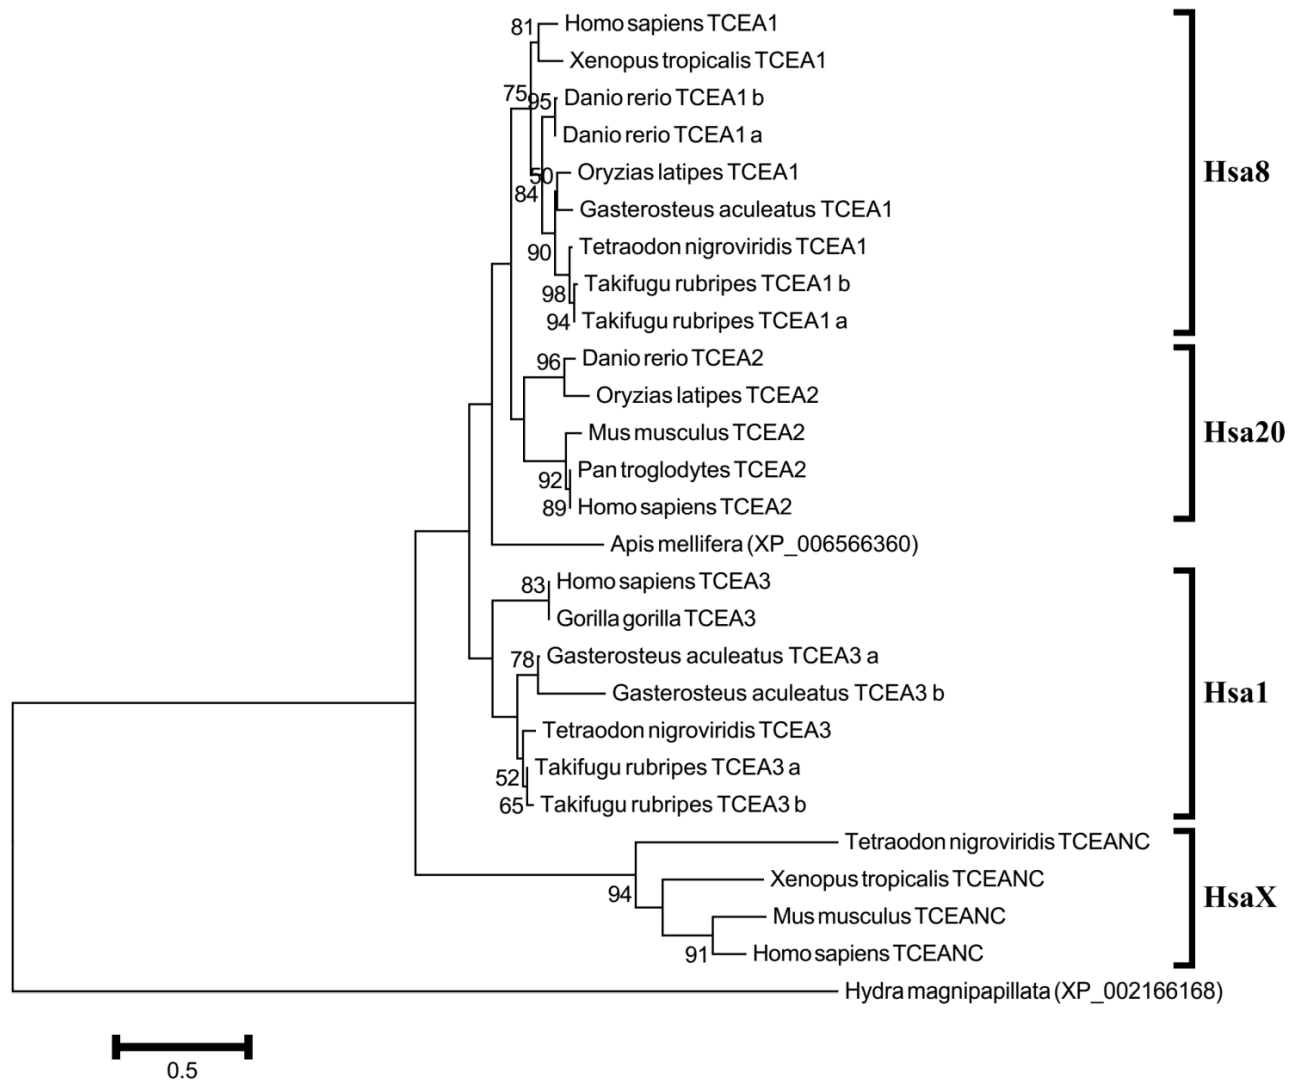

**Phylogenetic tree of TCEA family.**

The evolutionary history was inferred by using the Maximum Likelihood method based on the Whelan And Goldman model. The tree with the highest log likelihood (-4688.8104) is shown. The percentage of trees in which the associated taxa clustered together is shown next to the branches ; only the values  $\geq 50\%$  are shown here. A discrete Gamma distribution was used to model evolutionary rate differences among sites (5 categories (+G, parameter = 2.5721)). The tree is drawn to scale, with branch lengths measured in the number of substitutions per site. The analysis involved 27 amino acid sequences. All positions containing gaps and missing data were eliminated. There were a total of 197 positions in the final dataset.

## UBX Domain-Containing Protein-UBXN

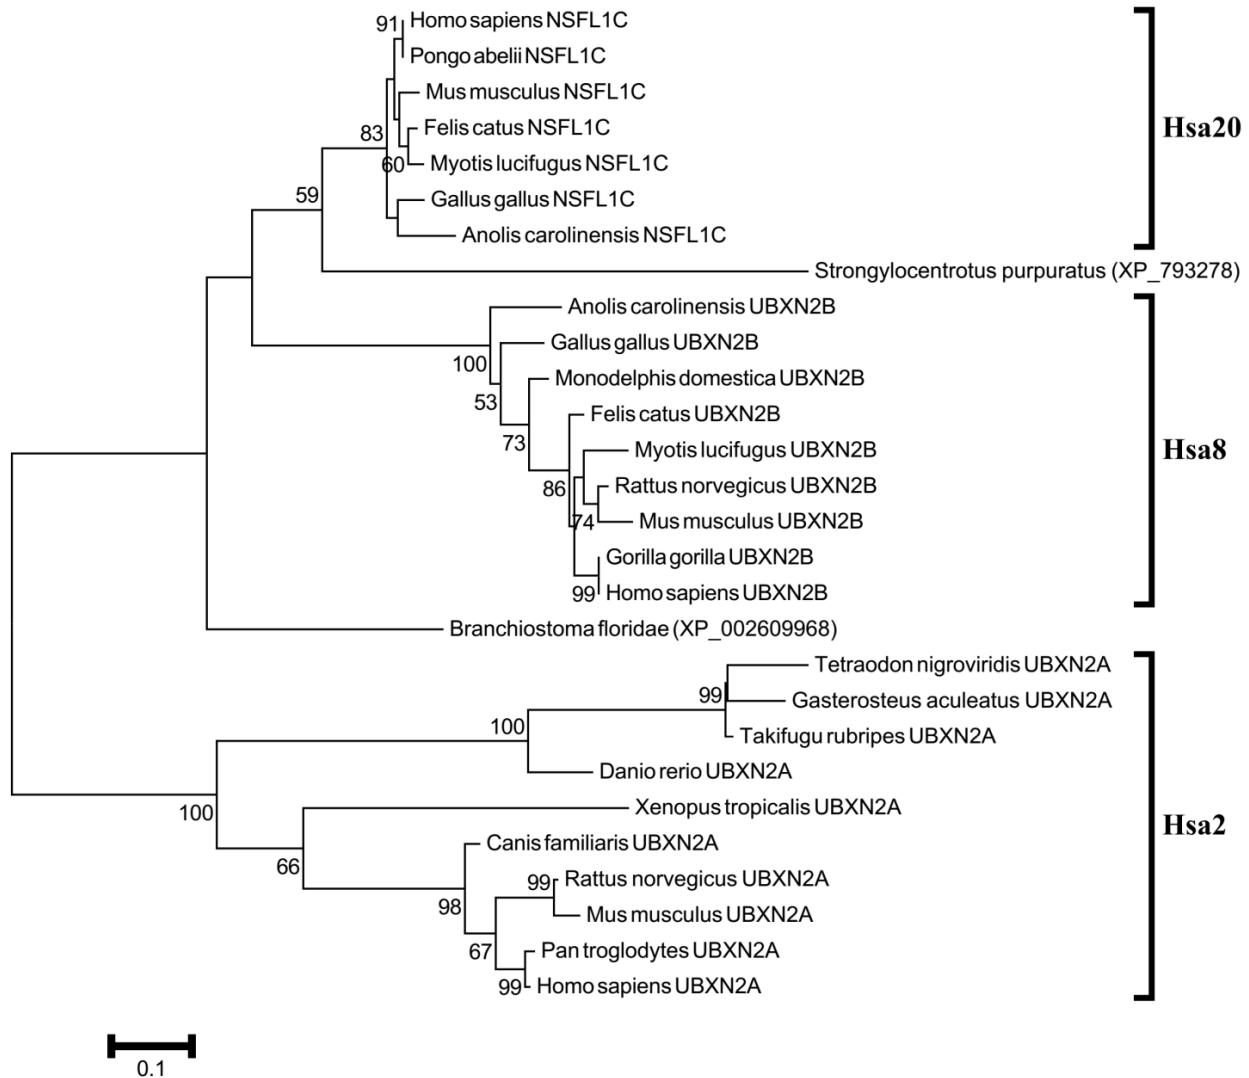

### Phylogenetic tree of UBXN family.

The evolutionary history was inferred by using the Maximum Likelihood method based on the Whelan And Goldman model. The tree with the highest log likelihood (-3195.4561) is shown. The percentage of trees in which the associated taxa clustered together is shown next to the branches ; only the values  $\geq 50\%$  are shown here. A discrete Gamma distribution was used to model evolutionary rate differences among sites (5 categories (+G, parameter = 2.3205)). The tree is drawn to scale, with branch lengths measured in the number of substitutions per site. The analysis involved 28 amino acid sequences. All positions containing gaps and missing data were eliminated. There were a total of 163 positions in the final dataset.
