# Supplementary material for: Evolutionary history of the human multigene families reveals widespread gene duplications throughout the history of animals
Source: Springer Nature journal article supplement (doi:10.1186/s12862-019-1441-0), 2019-06-20
Supplement: 12862_2019_1441_MOESM5_ESM.pdf [file 12862_2019_1441_MOESM5_ESM.pdf]

**Table S5: Summary of the Phylogenetic analysis of gene families whose three or more members are residing on human chromosomes 1, 2, 8 and 20.**

| Family name | Hsa1/13 <sup>a</sup> | Hsa2/6 <sup>b</sup> | Hsa8/X <sup>c</sup> | Hsa20/18 <sup>d</sup>         | Topology                    |
|-------------|----------------------|---------------------|---------------------|-------------------------------|-----------------------------|
| EYA         | EYA3                 | EYA4 <sup>b</sup>   | EYA1                | EYA2                          | (((6,8) 20) 1) 99, 76       |
| STMN        | STMN1                | -                   | STMN4<br>STMN2      | STMN3                         | (((1,8) 8) 20) 52, 100      |
| E2F         | E2F2                 | E2F3 <sup>b</sup>   | -                   | E2F1                          | ((1,6) 20) 82, 77           |
| MROH        | MROH7                | -                   | MROH5<br>MROH6      | MROH8                         | (((20,1) 8) 8) 53, 78       |
| STK         | STK24 <sup>a</sup>   | STK25               | STK26 <sup>c</sup>  | -                             | ((2,13) X) 77, 98           |
| HCK         | LCK                  | -                   | LYN<br>BLK          | HCK                           | (((8,20) (8,1)) 98,85       |
| DLGAP       | DLGAP3               | -                   | DLGAP2              | DLGAP4<br>DLGAP1 <sup>d</sup> | ((8,1) (20,18)) 67, 100, 71 |
| NKAIN       | NKAIN1               | NKAIN2 <sup>b</sup> | NKAIN3              | NKAIN4                        | ((20,8) (1,6)) 56, 99, 91   |
| KCNQ        | KCNQ4                | KCNQ5 <sup>b</sup>  | KCNQ3               | KCNQ2                         | ((6,1)(8,20)) 99,85, 69     |
| MATN        | MATN1                | MATN3               | MATN2               | MATN4                         | ((20,8) (1,2)) 74           |
| YTHDF       | YTHDF2               | -                   | YTHDF3              | YTHDF1                        | ((20,8) 1) 78,100           |
| XKR         | XKR8                 | -                   | XKR6<br>XKR4        | XKR7                          | (((8,8) 20) 1) 70, 89, 64   |
| MYT         | -                    | MYT1L               | ST18                | MYT1                          | ((20,2) 8) 99, 100          |
| FAM110      | -                    | FAM110C             | FAM110B             | FAM110A                       | ((8,20) 2) 100, 62          |
| NCOA        | -                    | NCOA1               | NCOA2               | NCOA3                         | ((20,8) 2) 100, 100         |
| KCNS        | -                    | KCNS3               | KCNS2               | KCNS1                         | ((20,8)2) 99                |

For each gene family the chromosomal location and topologies of those genes are given, which arose through duplications after the invertebrates-vertebrates split and before the tetrapods-fishes divergence. In this table only those gene families are given which are present in co-duplicated groups. The percentage bootstrap support of the internal branches is given below each relevant topology.

<sup>a, b, c</sup> Indicates that the gene family members are not positioned on Hsa 1, 2, 8 and 20 respectively.
